# Supplementary material
Source: PubMed Central journal article supplement (PMC1458923)
Supplement: pnas_0601434103_2.pdf [file pnas_0601434103_2.pdf]

**Table 1. Geographic locations and GenBank accession numbers of the environmental clone library**

| Phylogenetic group      | Clone                  | Gen Bank accession nos. | Latitude (N)<br>Longitude (W) | Type of sample           |
|-------------------------|------------------------|-------------------------|-------------------------------|--------------------------|
| $\alpha$ Proteobacteria | CC41P                  | AY604961                | 26°53.51'<br>102°05.178'      | Sediment                 |
|                         | CC42P                  | AY604960                | 26°53.51'<br>102°05.178'      | Sediment                 |
|                         | CC37P                  | AY604959                | 26°53.51'<br>102°05.178'      | Sediment                 |
|                         | CC43P                  | AY604962                | 26°53.51'<br>102°05.178'      | Sediment                 |
|                         | Rosario24.28           | AY604964                | 26°41.3'<br>101°47.65'        | Water column             |
|                         | Hundido26.12           | AY604963                | 26°35.6'<br>102°12.86'        | Water column             |
|                         | $\beta$ Proteobacteria | CC16.24                 | AY604953                      | 26°53.51'<br>102°05.178' |
| Hundido26.13            |                        | AY604952                | 26°35.6'<br>102°12.86'        | Water column             |
| Hundido1tn6             |                        | AY604954                | 26°32.245'<br>102°10.103'     | Water column             |
| Hundido2st6             |                        | AY604956                | 26°32.245'<br>102°10.103'     | Water column             |
| Hundido1tn4             |                        | AY604951                | 26°32.245'<br>102°10.103'     | Water column             |
| Calaveras27.3           |                        | AY604957                | 27°03.87'<br>102°08.75'       | Water column             |
| Calaveras28.21          |                        | AY604955                | 27°02.875'<br>102°06.375'     | Water column             |
| $\gamma$ Proteobacteria |                        | CC30P                   | AY604939                      | 26°53.51'<br>102°05.178' |
|                         | CC38P                  | AY604943                | 26°53.51'<br>102°05.178'      | Sediment                 |
|                         | CC45P                  | AY604944                | 26°53.51'<br>102°05.178'      | Sediment                 |
|                         | CC44P                  | AY604950                | 26°53.51'<br>102°05.178'      | Sediment                 |
|                         | CC32P                  | AY604947                | 26°53.51'<br>102°05.178'      | Sediment                 |
|                         | Rosario24.17           | AY604940                | 26°41.3'<br>101°47.65'        | Water column             |
|                         | Hundido26.20           | AY604942                | 26°35.6'<br>102°12.86'        | Water column             |
|                         | Hundido26.11           | AY604936                | 26°35.6'<br>102°12.86'        | Water column             |

| Phylogenetic group     | Clone          | Gen Bank accession nos. | Latitude (N)<br>Longitude (W) | Type of sample |
|------------------------|----------------|-------------------------|-------------------------------|----------------|
|                        | Hundido26.7    | AY604948                | 26°35.6'<br>102°12.86'        | Water column   |
|                        | Calaveras29.29 | AY604945                | 27°05.07'<br>102°11.5'        | Water column   |
|                        | Calaveras29.17 | AY604941                | 27°05.07'<br>102°11.5'        | Water column   |
|                        | Calaveras29.1  | AY604949                | 27°05.07'<br>102°11.5'        | Water column   |
| <i>Chloroflexi</i>     | Rosario24.49   | AY604937                | 26°41.3'<br>101°47.65'        | Water column   |
| <i>Nitrospira</i>      | Rosario24.38   | AY604966                | 26°41.3'<br>101°47.65'        | Water column   |
| <i>Bacteroidetes</i>   | CC16.31        | AY604973                | 26°53.51'<br>102°05.178'      | Water column   |
|                        | CC31P          | AY604969                | 26°53.51'<br>102°05.178'      | Sediment       |
|                        | CC36P          | AY604970                | 26°53.51'<br>102°05.178'      | Sediment       |
|                        | CC26P          | AY604967                | 26°53.51'<br>102°05.178'      | Sediment       |
|                        | CC50P          | AY604971                | 26°53.51'<br>102°05.178'      | Sediment       |
|                        | CC27P          | AY604972                | 26°53.51'<br>102°05.178'      | Sediment       |
| <i>Firmicutes</i>      | CC16.23        | AY604965                | 26°53.51'<br>102°05.178'      | Water column   |
| <i>Planctomycetes</i>  | CC16.22        | AY604968                | 26°53.51'<br>102°05.178'      | Water column   |
| <i>Verrucomicrobia</i> | CC29P          | AY604946                | 26°53.51'<br>102°05.178'      | Sediment       |
| <i>Deinococcus</i>     | Calaveras28.5  | AY604958                | 27°02.875'<br>102°06.375'     | Water column   |
| <i>Archaea</i>         | Rosario24.44   | AY604938                | 26°41.3'<br>101°47.65'        | Water column   |
