# Supplementary material
Source: PubMed Central journal article supplement (PMC1458923)
Supplement: pnas_0601434103_3.pdf [file pnas_0601434103_3.pdf]

**Table 2. Sequence affiliation in GenBank for the library of 16S rDNA clones**

| Phylogenetic groups | Clone            | Closest relative in GenBank                                         | Habitat                                            | Identity |
|---------------------|------------------|---------------------------------------------------------------------|----------------------------------------------------|----------|
| α Proteobacteria    | CC41P            | Rhodobacteraceae SRF3, AJ002565                                     | Marine                                             | 97       |
|                     | CC42P            | Rhodobacteraceae bacterium JC2049, AY442178                         | Not reported                                       | 98       |
|                     | CC37P            | <i>Roseobacter</i> sp. DG942, AY258088 <sup>6</sup>                 | Marine                                             | 97       |
|                     | CC43P            | Bacterium DG897, AY258085 <sup>6</sup>                              | Marine                                             | 99       |
|                     | Rosario24.28     | Uncultured alpha proteobacterium, AJ567562                          | Marine                                             | 90       |
|                     | Hundido26.12     | Uncultured bacterium, AY212600 <sup>7</sup>                         | Freshwater                                         | 97       |
| β Proteobacteria    | CC16.24          | Beta proteobacterium F1021, AF236005                                | Not reported                                       | 98       |
|                     | Hundido26.13     | Comamonadaceae bacterium MWH55, AJ556799                            | Freshwater                                         | 99       |
|                     | Hundido1tn6      | Unidentified bacterium, AF422679 <sup>8</sup>                       | Lake Waiau sediment                                | 95       |
|                     | Hundido2st6      | <i>Azospira oryzae</i> str. 6 <sup>a</sup> 3, AF011347 <sup>9</sup> | Roots                                              | 99       |
|                     | Hundido1tn4      | <i>Aquabacterium parvum</i> , AF035052 <sup>10</sup>                | Freshwater                                         | 99       |
|                     | Calaveras27.3    | Uncultured Limnobacter sp, AF522999                                 | Freshwater                                         | 100      |
|                     | Calaveras28.21   | Bacterium str. 82348, AF227863 <sup>11</sup>                        | Not reported                                       | 96       |
|                     | γ Proteobacteria | CC30P                                                               | Endosymbiont of unidentified scaly snail, AY310506 | Marine   |
| CC38P               |                  | Uncultured bacterium, AF328198 <sup>12</sup>                        | Mobile mud                                         | 96       |
| CC45P               |                  | Uncultured bacterium, AY171368                                      | Marine                                             | 97       |
| CC44P               |                  | <i>Pseudoalteromonas bacteriolytica</i> , D89929 <sup>13</sup>      | Marine                                             | 93       |
| CC32P               |                  | <i>Vibrio fortis</i> , AJ514914                                     | Marine                                             | 99       |
| Rosario24.17        |                  | Uncultured gamma proteobacterium, AY499915                          | Marine                                             | 95       |
| Hundido26.20        |                  | Uncultured bacterium, AY328792 <sup>14</sup>                        | Freshwater                                         | 99       |
| Hundido26.11        |                  | Uncultured Soil bacterium, AY493941                                 | Soil                                               | 99       |
| Hundido26.7         |                  | Uncultured bacterium, AY212677 <sup>14</sup>                        | Freshwater                                         | 98       |
| Calaveras29.29      |                  | <i>Teredinibacter turnerae</i> , AY028398 <sup>15</sup>             | Marine                                             | 95       |

| Phylogenetic groups    | Clone          | Closest relative in GenBank                                  | Habitat                            | Identity |
|------------------------|----------------|--------------------------------------------------------------|------------------------------------|----------|
|                        | Calaveras29.17 | Uncultured gamma proteobacterium, AY095889                   | Marine                             | 99       |
|                        | Calaveras29.1  | Unidentified bacterium, AY345489                             | Lake Waiau sediment                | 99       |
| <i>Chloroflexi</i>     | Rosario24.49   | Uncultured bacterium, AF524023 <sup>16</sup>                 | Forested wetland                   | 91       |
| <i>Nitrospira</i>      | Rosario24.38   | Uncultured soil bacterium, AY493920                          | Soil                               | 95       |
| <i>Bacteroidetes</i>   | CC16.31        | <i>Bacteroidetes bacterium</i> DG890, AY258122 <sup>6</sup>  | Marine                             | 90       |
|                        | CC31P          | Uncultured bacteroidetes bacterium, AJ567581                 | Marine                             | 93       |
|                        | CC36P          | <i>Brumimicrobium glaciale</i> , AF521195 <sup>17</sup>      | Marine                             | 91       |
|                        | CC26P          | Uncultured bacteroidetes bacterium, AB116508                 | Marine                             | 95       |
|                        | CC50P          | Uncultured eubacterium KEppib22, AF188173 <sup>18</sup>      | Marine                             | 89       |
|                        | CC27P          | Bacterium K2-15, AY345434                                    | Lake Kauhako, water                | 94       |
| <i>Firmicutes</i>      | CC16.23        | <i>Clostridium josui</i> , AB011057 <sup>19</sup>            | Compost                            | 91       |
| <i>Planctomycetes</i>  | CC16.22        | Uncultured bacterium, AJ519649                               | Uranium mill tailings, soil sample | 90       |
| <i>Verrucomicrobia</i> | CC29P          | Uncultured Verrucomicrobia bacterium, AY114325 <sup>20</sup> | Marine                             | 98       |
| <i>Deinococcus</i>     | Calaveras28.5  | <i>Deinococcus</i> sp. str. MBIC3950, AB022911               | Not reported                       | 98       |
| <i>Archaea</i>         | Rosario24.44   | Uncultured archaeon SAGMA-A, AB050205 <sup>21</sup>          | Gold mine                          | 98       |
