# Supplementary material
Source: PubMed Central journal article supplement (PMC1458923)
Supplement: pnas_0601434103_4.pdf [file pnas_0601434103_4.pdf]

**Table 3. Sequence affiliation in Ribosomal Data Base for the library of 16S rDNA clones**

| Phylogenetic group | Clone            | N     | Closest relative RDB                                                                  | Habitat                                                         | RDB similarity score |
|--------------------|------------------|-------|---------------------------------------------------------------------------------------|-----------------------------------------------------------------|----------------------|
| α Proteobacteria   | CC41P            | 1     | Rhodobacteraceae SRF3, AJ002565                                                       | Marine                                                          | 0.862                |
|                    | CC42P            | 1     | α-proteobacterium MBIC1876, AB026194                                                  | Marine                                                          | 0.866                |
|                    | CC37P            | 1     | <i>Ruegeria algalicola</i> str. T-FF3 ATCC 51440 (T), X78315 <sup>22</sup>            | Marine                                                          | 0.834                |
|                    | CC43P            | 1     | <i>Roseobacter</i> ISM, AF098495 <sup>23</sup>                                        | Marine                                                          | 0.901                |
|                    | Rosario24.28     | 1     | <i>Dechlorospirillum</i> WD, AF170352 <sup>24</sup>                                   | Not reported                                                    | 0.627                |
|                    | Hundido26.12     | 1     | <i>Caulobacter</i> sp. str. FWC38, AJ227774 <sup>25</sup>                             | Activated sludge                                                | 0.845                |
| β Proteobacteria   | CC16.24          | 6     | <i>Aquaspirillum delicatum</i> str. 146 LMG 4328 (T), AF078756 <sup>26</sup>          | Distilled water                                                 | 0.924                |
|                    | Hundido26.13     | 1     | <i>Aquabacterium Aqua2</i> , AF089858                                                 | Freshwater                                                      | 0.889                |
|                    | Hundido1tn6      | 1     | <i>Acidovorax</i> LW1, AJ130765 <sup>27</sup>                                         | Not reported                                                    | 0.816                |
|                    | Hundido2st6      | 1     | <i>Azospira oryzae</i> str. 6 <sup>93</sup> , AF011347 <sup>9</sup>                   | Roots                                                           | 0.954                |
|                    | Hundido1tn4      | 1     | <i>Aquabacterium parvum</i> str.B6, AF035052                                          | Freshwater                                                      | 0.947                |
|                    | Calaveras27.3    | 2     | <i>H.seropedicae</i> ATCC 35892, Y10146                                               | Roots                                                           | 0.813                |
|                    | Calaveras28.1    | 5     | <i>Vogesella indigofera</i> ATCC 19706 (T), AB021385 <sup>28</sup>                    | Soil                                                            | 0.913                |
|                    | γ Proteobacteria | CC30P | 1                                                                                     | Endosymbiont of <i>Riftia pachyptila</i> , U77478 <sup>29</sup> | Hydrothermal vent    |
| CC38P              |                  | 1     | Uncultured g proteobacteria Sva0120, AJ240993 <sup>30</sup>                           | Marine                                                          | 0.796                |
| CC45P              |                  | 1     | Uncultured g proteobacteria Sva0120, AJ240993 <sup>30</sup>                           | Marine                                                          | 0.851                |
| CC44P              |                  | 1     | <i>Pseudoalteromonas</i> UL1, AF172991 <sup>31</sup>                                  | Marine                                                          | 0.752                |
| CC32P              |                  | 1     | <i>Vibrio nereis</i> ATCC 25917, X74716 <sup>32</sup>                                 | Marine                                                          | 0.974                |
| Rosario24.17       |                  | 5     | Symbiont of <i>Anodontia philippiana</i> (bivalve mollusc) gill, L25711 <sup>33</sup> | Marine                                                          | 0.769                |

| Phylogenetic group     | Clone          | N  | Closest relative RDB                                                   | Habitat                       | RDB similarity score |
|------------------------|----------------|----|------------------------------------------------------------------------|-------------------------------|----------------------|
|                        | Hundido26.20   | 2  | <i>Pseudomonas</i> str. S2, AJ002813 <sup>34</sup>                     | Gut of soil microarthropod    | 0.756                |
|                        | Hundido26.11   | 2  | <i>Curacaobacter baltica</i> str.OS 140, AJ002006 <sup>35</sup>        | Marine                        | 0.87                 |
|                        | Hundido26.7    | 3  | □ proteobacteria HTB010, AB010858 <sup>36</sup>                        | Marine                        | 0.905                |
|                        | Calaveras29.9  | 14 | Proteobacteria SCB11, Z31658                                           | Marine                        | 0.836                |
|                        | Calaveras29.17 | 1  | Uncultured gamma proteobacterium OM60, U70696 <sup>37</sup>            | Marine                        | 0.854                |
|                        | Calaveras29.1  | 1  | <i>Alterosomas macleodii</i> DSM 6062, Y1822838                        | Marine                        | 0.93                 |
| <i>Chloroflexi</i>     | Rosario24.49   | 1  | <i>Unc eubacterium</i> WCHA 1-16, AF050608 <sup>39</sup>               | Deep contaminated water       | 0.638                |
| <i>Nitrospira</i>      | Rosario24.38   | 1  | Eubacteria clone 11-14, Z95707 <sup>40</sup>                           | Soil                          | 0.716                |
| <i>Bacteroidetes</i>   | CC16.31        | 1  | <i>Microscilla furvescens</i> str. TV-2 ATCC 23129, M58792             | Soil                          | 0.572                |
|                        | CC31P          | 1  | <i>Cytophaga</i> sp. str. BD1-15, AB015524 <sup>41</sup>               | Marine                        | 0.716                |
|                        | CC36P          | 1  | <i>Zobellia uliginosa</i> ATCC 14397, M62799 <sup>42</sup>             | Marine                        | 0.631                |
|                        | CC26P          | 1  | Uncultured <i>Cytophagales</i> clone QSSC9L-1, AF170779                | Marine                        | 0.63                 |
|                        | CC50P          | 1  | <i>Microscilla furvescens</i> str. TV-2 ATCC 23129, M58792             | Soil                          | 0.683                |
|                        | CC27P          | 1  | <i>Zobellia uliginosa</i> ATCC 14397, M62799 <sup>42</sup>             | Marine                        | 0.654                |
| <i>Firmicutes</i>      | CC16.23        | 1  | <i>Clostridium cellulolyticum</i> ATCC 35319 (T), X71847 <sup>43</sup> | Decayed grass in compost pile | 0.733                |
| <i>Planctomycetes</i>  | CC16.22        | 1  | <i>Planctomycete</i> clone 14, AJ131819 <sup>44</sup>                  | Biofilm                       | 0.58                 |
| <i>Verrucomicrobia</i> | CC29P          | 2  | <i>Marinobacter aquaeolei</i> str.VT8, AJ000726 <sup>45</sup>          | Vietnamese oil-producing well | 0.632                |
| <i>Deinococcus</i>     | Calaveras28.5  | 2  | <i>Deinococcus</i> sp. str. MBIC3950, AB022911                         | Not reported                  | 0.93                 |
| <i>Archaea</i>         | Rosario24.44   | 6  | Unidentified archaeon pIVWA2, AB019730 <sup>46</sup>                   | Hydrothermal vent             | 0.779                |
