# Supplementary material
Source: PubMed Central journal article supplement (PMC1458923)
Supplement: pnas_0601434103_5.pdf [file pnas_0601434103_5.pdf]

**Table 4. ANOVA for the BLAST study**

| Source  | DF  | Sum of squares | Mean square | F Ratio |
|---------|-----|----------------|-------------|---------|
| Model   | 9   | 21,548770      | 2,39431     | 14,6746 |
| Error   | 338 | 55,148097      | 0,16316     | Prob >F |
| C Total | 347 | 76,696868      | 0,22103     | < ,0001 |

The data matrix is available upon request. The studies are: Casamayor 2000 (LAKE1,  $n = 21$  Sulfurous lakes: Cisó lake and Vilar lake, Spain) Demergasso 2004 (LAKE2,  $n = 31$ , Atacama desert, northern Chile ) Humayoun 2002 (LAKE3,  $n = 63$  Mono Lake, California) Kuske 1997 (SOIL,  $n = 39$ , Soils of the arid southwestern United States) Sekigushi 2002 (RIVER,  $n = 27$ , Changjiang River, China), Angert 1998 (SUBRIVER,  $n = 16$ , Sulphur river, parker cave, Kentucky ) Madrid 2001 (SEA,  $n = 68$ , Cariaco Basin), Bowman 1999 (ANTLAKE,  $n = 30$ , Hypersaline antarctic lakes) Williams 2004 (FRESHWAT  $n = 17$ , drinking water in a distribution system simulator).
