# Supplementary material
Source: PubMed Central journal article supplement (PMC1458923)
Supplement: pnas_0601434103_6.pdf [file pnas_0601434103_6.pdf]

**Table 5. Morphotypes of cultivated strains in diverse culture media**

| Strain | EMB    | VB     | MCK   | TCBS  | TSI   | Gas |
|--------|--------|--------|-------|-------|-------|-----|
|        | Color  | Color  | Color | Color | Color | Gas |
| 8423   | 6-3-35 | 7-2-36 | 8-1-4 | nc    | 2     | 0   |
| 8424   | 6-3-35 | 7-2-36 | 8-1-4 | nc    | 2     | 0   |
| 8425   | 6-3-35 | 7-2-36 | 8-1-4 | nc    | 2     | 0   |
| 8426   | 6-3-35 | 7-2-36 | 8-1-4 | nc    | 2     | 0   |
| 8427   | 6-3-35 | 7-2-36 | 8-1-4 | nc    | 2     | 0   |
| 8428   | 6-3-35 | 7-2-36 | 8-1-4 | nc    | 2     | 0   |
| 8429   | 6-3-35 | 7-2-36 | 8-1-4 | nc    | 2     | 0   |
| 8430   | 6-3-35 | 7-2-36 | 8-1-4 | nc    | 2     | 0   |
| 8431   | 6-3-35 | 7-2-36 | 8-1-4 | nc    | 2     | 0   |
| 8432   | 6-3-35 | 7-2-36 | 8-1-4 | nc    | 2     | 0   |
| 8433   | 6-3-35 | 7-2-36 | 8-1-4 | nc    | 2     | 0   |
| 8434   | 6-3-35 | 7-2-36 | 8-1-4 | nc    | 2     | 0   |
| 8435   | 6-3-35 | 7-2-36 | 8-1-4 | nc    | 2     | 0   |
| 8436   | 6-3-35 | 7-2-36 | 8-1-4 | nc    | 2     | 0   |
| 8437   | 6-3-35 | 7-2-36 | 8-1-4 | nc    | 2     | 0   |
| 8438   | 6-3-35 | 7-2-36 | 8-1-4 | nc    | 2     | 0   |
| 8439   | nc     | nc     | nc    | nc    | 2     | 0   |
| 8440   | nc     | nc     | nc    | nc    | nc    | nc  |
| 8441   | 2.3    | nc     | 1.5   | nc    | 1     | 0   |
| 8442   | nc     | nc     | nc    | nc    | nc    | nc  |
| 8443   | nc     | nc     | nc    | nc    | nc    | nc  |
| 8444   | 2.2    | 5.7/p  | 1.5   | nc    | 1     | 0   |
| 8445   | nc     | nc     | nc    | nc    | nc    | nc  |
| 8446   | nc     | nc     | nc    | nc    | nc    | nc  |
| 8447   | nc     | nc     | nc    | nc    | nc    | nc  |
| 8448   | nc     | 5.8/p  | nc    | nc    | 1     | 0   |
| 8449   | nc     | nc     | nc    | nc    | nc    | nc  |
| 8450   | nc     | nc     | nc    | nc    | nc    | nc  |
| 8451   | nc     | nc     | nc    | nc    | nc    | nc  |
| 8452   | 6-5-1  | nc     | 8-1-4 | nc    | 1     | 0   |
| 8453   | nc     | nc     | nc    | nc    | nc    | nc  |
| 8454   | 4-3-36 | nc     | 8-1-4 | nc    | 1     | 0   |
| 8455   | 7-2-36 | 6-4-1  | 8-1-4 | nc    | 2     | 0   |

| Strain | EMB     | VB    | MCK    | TCBS  | TSI   |     |
|--------|---------|-------|--------|-------|-------|-----|
|        | Color   | Color | Color  | Color | Color | Gas |
| 8456   | 7-2-36  | 6-4-1 | 8-1-4  | nc    | 2     | 0   |
| 8457   | 7-2-36  | 6-4-1 | 8-1-4  | nc    | 2     | 0   |
| 8458   | 7-2-36  | 6-4-1 | 8-1-4  | nc    | 2     | 0   |
| 8459   | 7-2-36  | 6-4-1 | 8-1-4  | nc    | 2     | 0   |
| 8460   | 7-2-36  | 6-4-1 | 8-1-4  | nc    | 2     | 0   |
| 8461   | 7-2-36  | 6-4-1 | 8-1-4  | nc    | 2     | 0   |
| 8462   | 7-2-36  | 6-4-1 | 8-1-4  | nc    | 2     | 0   |
| 8463   | 7-2-36  | 6-2-7 | 8-1-4  | nc    | 2     | 0   |
| 8464   | 7-2-36  | 6-4-1 | 8-1-4  | nc    | 2     | 0   |
| 8465   | 7-2-36  | 6-4-1 | 8-1-4  | nc    | 2/1   | 0   |
| 8466   | 7-2-36  | 6-4-1 | 8-1-4  | nc    | 2     | 0   |
| 8467   | 7-2-36  | 6-4-1 | 8-1-4  | nc    | 2     | 0   |
| 8468   | 7-2-36  | 6-4-1 | 8-1-4  | nc    | 2     | 0   |
| 8469   | 7-2-36  | 6-4-1 | 8-1-4  | nc    | 2     | 0   |
| 8470   | 7-2-36  | 6-4-1 | 8-1-4  | nc    | 2     | 0   |
| 8471   | nc      | nc    | 6-1-5  | nc    | 2     | 0   |
| 8472   | nc      | nc    | nc     | nc    | nc    | nc  |
| 8473   | 7-2-2   | 6-4-1 | 7-2-5  | nc    | 2     | 0   |
| 8474   | nc      | nc    | nc     | nc    | 2/1   | 0   |
| 8475   | 7-2-2   | 6-4-1 | 7-2-5  | nc    | 2     | 0   |
| 8476   | nc      | nc    | nc     | nc    | nc    | nc  |
| 8477   | nc      | nc    | nc     | nc    | nc    | nc  |
| 8478   | nc      | nc    | 2-3    | nc    | 2     | 0   |
| 8479   | 7-2-2   | 6-4-1 | 7-2-5  | nc    | 2/1   | 0   |
| 8480   | 2.3c2.1 | 8-4-9 | 8-1-2  | nc    | 2     | 0   |
| 8481   | nc      | 6-4-1 | 2-3    | nc    | 2     | 0   |
| 8482   | nc      | nc    | 1-5    | nc    | 1     | 0   |
| 8483   | 2.3c2.1 | 8-4-9 | 8-1-2  | nc    | 1     | 0   |
| 8484   | nc      | nc    | 1-5    | nc    | 2     | 0   |
| 8485   | 2.3c2.1 | 8-4-9 | 8-1-2  | nc    | 2     | 0   |
| 8486   | nc      | nc    | 1-5    | nc    | 2     | 0   |
| 8487   | 2.3c1.1 | 8-6-9 | 8-1-35 | nc    | 2/1   | 0   |
| 8488   | 2.3c1.1 | 8-6-9 | 8-1-35 | nc    | 2/1   | 1   |
| 8489   | 2.3c1.1 | 8-6-9 | 7-1-2  | nc    | 2/1   | 0   |

| Strain | EMB     | VB    | MCK   | TCBS  | TSI   |     |
|--------|---------|-------|-------|-------|-------|-----|
|        | Color   | Color | Color | Color | Color | Gas |
| 8490   | 2.3c1.1 | 8-6-9 | 7-1-2 | nc    | 2/1   | 0   |
| 8491   | 2.3c1.1 | 8-6-9 | 7-1-2 | nc    | 2/1   | 0   |
| 8492   | 1.1     | 6-7   | 1-3   | nc    | 1     | 0   |
| 8493   | 2.3c1.1 | 8-6-9 | 7-1-2 | nc    | 2/1   | 0   |
| 8494   | 2.3c1.1 | 8-6-9 | 7-1-2 | nc    | 2/1   | 0   |
| 8495   | 2.3c1.1 | 8-6-9 | 7-1-2 | nc    | 2/1   | 0   |
| 8496   | 2.3c1.1 | 8-6-9 | 7-1-2 | nc    | 2/1   | 0   |
| 8497   | 2.3c1.1 | 8-6-9 | 7-1-2 | nc    | 2/1   | 0   |
| 8498   | 2.3c1.1 | 8-6-9 | 7-1-2 | nc    | 2/1   | 0   |
| 8499   | 2.3c1.1 | 8-6-9 | 7-1-2 | nc    | 2/1   | 0   |
| 8500   | 2.3c1.1 | 8-6-9 | 7-1-2 | nc    | 2/1   | 0   |
| 8501   | nc      | nc    | nc    | nc    | nc    | nc  |
| 8502   | 1.3c1.1 | 5-7   | 1-5   | nc    | 2/1   | 1   |
| 8503   | 2-3-35  | 6-3-1 | 1.2   | nc    | 2/1   | 0   |
| 8504   | 6-2-7   | 7-1-4 | 3.2   | nc    | 2     | 0   |
| 8505   | 6-2-7   | 7-1-4 | 3.2   | nc    | 2     | 0   |
| 8506   | 6-2-7   | 7-1-4 | 3.2   | nc    | 2     | 0   |
| 8507   | 6-2-7   | 7-1-4 | 3.2   | nc    | 2     | 0   |
| 8508   | 6-2-7   | 7-1-4 | 3.2   | nc    | 2     | 0   |
| 8509   | 6-2-7   | 7-1-4 | 3.2   | nc    | 2     | 0   |
| 8510   | 6-2-7   | 7-1-4 | 2.3   | nc    | 2     | 0   |
| 8511   | 6-3-35  | 6-3-1 | 2.3   | nc    | 2     | 0   |
| 8512   | 6-2-7   | 7-1-4 | 3.2   | nc    | 2     | 0   |
| 8513   | 6-2-7   | 7-1-4 | 3.2   | nc    | 2     | 0   |
| 8514   | 6-2-7   | 7-1-4 | 1.2   | nc    | 2     | 0   |
| 8515   | 4-3-35  | 6-3-1 | 3.2   | nc    | 2/1   | 0   |
| 8516   | 6-2-7   | 7-1-4 | 1.2   | nc    | 2     | 0   |
| 8517   | 4-3-35  | 6-3-1 | 3.2   | nc    | 2/1   | 0   |
| 8518   | 6-2-7   | 3.6   | 2.3   | nc    | 2     | 0   |
| 8519   | 4-3-34  | 5.7p  | 2.5   | nc    | 2/1   | 1   |
| 8520   | 4-3-34  | 5.7p  | 2.5   | nc    | 2/1   | 1   |
| 8521   | 4-3-34  | 5.7p  | 2.5   | nc    | 2/1   | 0   |
| 8522   | 4-3-34  | 5.7p  | 2.5   | nc    | 1     | 0   |
| 8523   | 4-3-34  | 5.7p  | 2.5   | nc    | 2/1   | 0   |

| Strain | EMB    | VB     | MCK   | TCBS  | TSI   |     |
|--------|--------|--------|-------|-------|-------|-----|
|        | Color  | Color  | Color | Color | Color | Gas |
| 8524   | 4-3-34 | 5.7p   | 2.5   | nc    | 2/1   | 0   |
| 8525   | 4-3-34 | 5.7p   | 2.5   | nc    | 1     | 0   |
| 8526   | 4-3-34 | 5.7p   | 2.5   | nc    | 2/1   | 1   |
| 8527   | 4-3-34 | 5.7p   | 2.5   | nc    | 1     | 0   |
| 8528   | 4-3-34 | 5.7p   | 2.5   | nc    | 2/1   | 0   |
| 8529   | 4-3-34 | 5.7p   | 2.5   | nc    | 2/1   | 0   |
| 8530   | 4-3-34 | 5.7p   | 2.5   | nc    | 2/1   | 0   |
| 8531   | 4-3-34 | 5.7p   | 2.5   | nc    | 1     | 0   |
| 8532   | 4-3-34 | 5.7p   | 2.5   | nc    | 2/1   | 0   |
| 8533   | 4-3-34 | 5.7p   | 2.5   | nc    | 2/1   | 0   |
| 8534   | 4-3-34 | 5.7p   | 2.5   | nc    | 2/1   | 0   |
| 8535   | 2.2    | 7-2-36 | 3.5   | nc    | 2     | 0   |
| 8536   | 2.2    | 7-2-36 | 3.5   | nc    | 2     | 0   |
| 8537   | 2.2    | 7-2-36 | 3.5   | nc    | 2     | 0   |
| 8538   | 2.2    | 7-2-36 | 3.5   | nc    | 3     | 0   |
| 8539   | 2.2    | 7-2-36 | 3.5   | nc    | 2     | 0   |
| 8540   | 2.2    | 7-2-36 | 3.5   | nc    | 2     | 0   |
| 8541   | 2.2    | 7-2-36 | 3.5   | nc    | 2     | 0   |
| 8542   | 2.2    | 7-2-36 | 3.5   | nc    | 2     | 0   |
| 8543   | 2.2    | 7-2-36 | 3.5   | nc    | 2     | 0   |
| 8544   | 2.2    | 7-2-36 | 3.5   | nc    | 2     | 0   |
| 8545   | 2.2    | 7-2-36 | 3.5   | nc    | 2     | 0   |
| 8546   | 2.2    | 7-2-36 | 3.5   | nc    | 2     | 0   |
| 8547   | 2.2    | 7-2-36 | 3.5   | nc    | 2     | 0   |
| 8548   | 2.2    | 7-2-36 | 3.5   | nc    | 2     | 0   |
| 8549   | 2.2    | 7-2-36 | 3.5   | nc    | 2     | 0   |
| 8550   | 2.2    | 7-2-36 | 3.5   | nc    | 2     | 0   |
| 8551   | 1.3    | 5.7p   | 2-5   | nc    | 2/1   | 0   |
| 8552   | 1-3    | 5.7p   | 2-5   | nc    | 2/1   | 0   |
| 8553   | 1-3    | 5.7p   | 2-5   | nc    | 2/1   | 0   |
| 8554   | 1-3    | cont   | 2-5   | nc    | 2/1   | 0   |
| 8555   | 1-3    | 5.7p   | 2-5   | nc    | 2/1   | 1   |
| 8556   | 1-3    | 5.7p   | 2-5   | nc    | 1     | 0   |
| 8557   | 1-3    | 5.7p   | 2-5   | nc    | 1     | 0   |

| Strain | EMB    | VB     | MCK   | TCBS  | TSI   |     |
|--------|--------|--------|-------|-------|-------|-----|
|        | Color  | Color  | Color | Color | Color | Gas |
| 8558   | 1-1    | 5.7p   | 2-5   | nc    | 2/1   | 0   |
| 8559   | 1-1    | 5.7p   | 2-5   | nc    | 2/1   | 0   |
| 8560   | 1-1    | 5-7    | 2-5   | nc    | 2/1   | 0   |
| 8561   | 1-1    | nc     | 2-5   | nc    | 2/1   | 0   |
| 8562   | 1-1    | nc     | 2-5   | nc    | 1     | 0   |
| 8563   | 1-1    | nc     | 2-5   | nc    | 1     | 0   |
| 8564   | 1-1    | 5.7p   | 2-5   | nc    | 1     | 0   |
| 8565   | 1-1    | nc     | 2-5   | nc    | 2/1   | 1   |
| 8566   | 1-1    | 5-7    | 2-5   | nc    | 1     | 1   |
| 8567   | 5-4-2  | 7-2-36 | 2.5   | nc    | 2     | 0   |
| 8568   | 5-4-2  | 7-2-36 | 2.5   | nc    | 2     | 0   |
| 8569   | 5-4-2  | 7-2-36 | 2.5   | nc    | 2     | 0   |
| 8570   | 5-2-33 | 7-2-36 | 2.5   | nc    | 2     | 0   |
| 8571   | 5-4-2  | 7-2-36 | 2.5   | nc    | 2     | 0   |
| 8572   | 5-2-33 | 7-2-36 | 2.5   | nc    | 2     | 0   |
| 8573   | 5-4-2  | 7-2-36 | 2.5   | nc    | 2     | 0   |
| 8574   | 5-2-33 | 7-2-36 | 2.5   | nc    | 2     | 0   |
| 8575   | 5-2-33 | 7-2-36 | 2.5   | nc    | 2     | 0   |
| 8576   | 5-4-2  | 7-2-36 | 2.5   | nc    | 2     | 0   |
| 8577   | 5-4-2  | 7-2-36 | 2.5   | nc    | 2     | 0   |
| 8578   | 5-2-33 | 7-2-36 | 2.5   | nc    | 2     | 0   |
| 8579   | 5-2-33 | 7-2-36 | 2.5   | nc    | 2     | 0   |
| 8580   | 5-2-33 | 7-2-36 | 2.5   | nc    | 2     | 0   |
| 8581   | 5-2-33 | 7-2-36 | nc    | nc    | 2     | 0   |
| 8582   | 5-2-33 | 7-2-36 | nc    | nc    | nc    | nc  |
| 8583   | 2-3    | 2-6    | 1.5   | nc    | 2     | 0   |
| 8584   | nc     | nc     | nc    | nc    | 2     | 0   |
| 8585   | 6-2-36 | 2.3    | 2.5   | nc    | 2     | 0   |
| 8586   | nc     | nc     | nc    | nc    | nc    | nc  |
| 8587   | 2.5    | 3.4    | 1.3   | nc    | 2     | 0   |
| 8588   | 7-1-2  | 6-1-4  | 3.2   | nc    | 2     | 0   |
| 8589   | 6-2-36 | 6-1-4  | 1.3   | nc    | 2     | 0   |
| 8590   | 7-1-2  | 6-1-4  | 3.2   | nc    | 2     | 0   |
| 8591   | 6-2-36 | 6-1-4  | 1.3   | nc    | 2     | 0   |

| Strain | EMB    | VB           | MCK   | TCBS  | TSI   |     |
|--------|--------|--------------|-------|-------|-------|-----|
|        | Color  | Color        | Color | Color | Color | Gas |
| 8592   | 1.3    | 2.3          | 2.5   | nc    | 2     | 0   |
| 8593   | 1-3    | 6-1-4        | 1.3   | nc    | 2     | 0   |
| 8594   | nc     | nc           | nc    | nc    | nc    | nc  |
| 8595   | nc     | 5.7p         | nc    | nc    | 1     | 0   |
| 8596   | 6-2-36 | 6-1-4        | 1.3   | nc    | 1     | 0   |
| 8597   | 7-1-2  | 6-1-4        | 1.3   | nc    | 1     | 0   |
| 8598   | nc     | nc           | nc    | nc    | 2     | 0   |
| 8599   | 5-4-36 | 7-4-10       | 2.1   | nc    | 2/1   | 0   |
| 8600   | nc     | nc           | nc    | nc    | 2     | 0   |
| 8601   | nc     | nc           | nc    | nc    | 2     | 0   |
| 8602   | nc     | nc           | nc    | nc    | 2     | 0   |
| 8603   | nc     | nc           | nc    | nc    | 2     | 0   |
| 8604   | nc     | nc           | nc    | nc    | 2     | 0   |
| 8605   | nc     | nc           | nc    | nc    | 2     | 0   |
| 8606   | nc     | nc           | 2.3   | nc    | 2     | 0   |
| 8607   | nc     | nc           | nc    | nc    | 2     | 0   |
| 8608   | 1.1    | 6-7/p        | 2.3   | nc    | 2/1   | 0   |
| 8609   | 1.1    | 6-7/p        | nc    | nc    | 2/1   | 0   |
| 8610   | 6-1-4  | 6-1-4        | 3.1   | nc    | 2     | 0   |
| 8611   | 6-5-2  | 6-1-4/7-4-10 | z     | nc    | 1     | 0   |
| 8612   | 6-1-4  | 6-1-4        | 3.1   | nc    | 2     | 0   |
| 8613   | nc     | nc           | nc    | nc    | nc    | 0   |
| 8614   | 6-1-4  | 6-1-4        | 3.1   | nc    | 2     | 0   |
| 8615   | 7-1-35 | 7-1-4        | 3.1   | nc    | 2     | 0   |
| 8616   | 7-1-35 | 7-1-4        | 3.1   | nc    | 2     | 0   |
| 8617   | nc     | nc           | nc    | nc    | 1     | 0   |
| 8618   | 7-1-35 | 7-1-4        | 3.1   | nc    | 2     | 0   |
| 8619   | 7-1-35 | 7-1-4        | 3.1   | nc    | 2     | 0   |
| 8620   | 7-4-36 | 7-1-4        | z     | nc    | 2/1   | 0   |
| 8621   | nc     | nc           | nc    | nc    | nc    | nc  |
| 8622   | 7-1-35 | 7-1-4        | 3.1   | nc    | 3     | nc  |
| 8623   | 7-4-36 | 7-1-4        | z     | nc    | 2/1   | 1   |
| 8624   | 7-4-36 | 7-1-4        | z     | nc    | 2/1   | 1   |
| 8625   | 7-4-36 | 7-1-4        | z     | nc    | 2/1   | 1   |

| Strain | EMB     | VB    | MCK   | TCBS  | TSI   |     |
|--------|---------|-------|-------|-------|-------|-----|
|        | Color   | Color | Color | Color | Color | Gas |
| 8626   | 7-1-35  | 7-1-4 | 3.1   | nc    | nc    | 1   |
| 8627   | 7-1-35  | 7-1-4 | 3.1   | nc    | 2     | 1   |
| 8628   | 7-1-35  | 7-1-4 | 3.1   | nc    | 2     | 1   |
| 8629   | 7-1-35  | 7-1-4 | 3.1   | nc    | 2     | 1   |
| 8630   | 7-1-35  | 7-1-4 | 3.1   | nc    | 2     | 1   |
| 8631   | 6.3c2.5 | 3.4   | 3.2   | nc    | 2     | 0   |
| 8632   | 7-2-1   | 7-2-4 | 3.1   | nc    | 2     | 0   |
| 8633   | 7-2-1   | 7-2-4 | 3.1   | nc    | 2     | 0   |
| 8634   | 7-2-1   | 7-2-4 | 3.1   | nc    | 2     | 0   |
| 8635   | 7-2-1   | 7-2-4 | 3.1   | nc    | 2     | 0   |
| 8636   | 7-2-1   | 7-2-4 | 3.1   | nc    | 2     | 0   |
| 8637   | 7-2-1   | 7-2-4 | 3.1   | nc    | 2     | 0   |
| 8638   | 7-2-1   | 7-2-4 | 3.1   | nc    | 2     | 0   |
| 8639   | 7-2-1   | 7-2-4 | 3.1   | nc    | 2     | 0   |
| 8640   | 7-2-1   | 7-2-4 | 3.1   | nc    | 2     | 0   |
| 8641   | 7-2-1   | 7-2-4 | 3.1   | nc    | 2     | 0   |
| 8642   | nc      | 3.2/p | nc    | nc    | 2     | 0   |
| 8643   | nc      | 3.2/p | nc    | nc    | 2     | 0   |
| 8644   | nc      | 3.2/p | nc    | nc    | 2     | 0   |
| 8645   | nc      | 3.2/p | nc    | nc    | 2     | 0   |
| 8646   | 5.4.1   | 6.6.5 | nc    | nc    | 3     | 0   |
| 8647   | nc      | 3.2/p | nc    | nc    | 2     | 0   |
| 8648   | nc      | 3.2/p | nc    | nc    | 2     | 0   |
| 8649   | nc      | 3.2/p | nc    | nc    | 2     | 0   |
| 8650   | nc      | 3.2/p | nc    | nc    | 2     | 0   |
| 8651   | nc      | 3.2/p | nc    | nc    | 2     | 0   |
| 8652   | nc      | 3.2/p | nc    | nc    | 2     | 0   |
| 8653   | nc      | 3.2/p | nc    | nc    | 2     | 0   |
| 8654   | nc      | 3.2/p | nc    | nc    | 2     | 0   |
| 8655   | nc      | 3.2/p | nc    | nc    | 2     | 0   |
| 8656   | nc      | nc    | nc    | nc    | 1/2   | 0   |
| 8657   | nc      | nc    | nc    | nc    | 2     | 0   |
| 8658   | nc      | nc    | nc    | nc    | 2     | 0   |
| 8659   | nc      | nc    | nc    | nc    | 2     | 0   |

| Strain | EMB   | VB         | MCK   | TCBS   | TSI   |     |
|--------|-------|------------|-------|--------|-------|-----|
|        | Color | Color      | Color | Color  | Color | Gas |
| 8660   | nc    | nc         | nc    | nc     | 2     | 0   |
| 8661   | nc    | nc         | nc    | nc     | 2     | 0   |
| 8662   | nc    | nc         | nc    | nc     | 2     | 0   |
| 8663   | nc    | nc         | 1.2   | nc     | 2/1   | 0   |
| 8664   | nc    | nc         | nc    | nc     | 2     | 0   |
| 8665   | nc    | nc         | 1.2   | nc     | 1     | 0   |
| 8666   | nc    | nc         | 1.2   | nc     | 2/1   | 0   |
| 8667   | nc    | nc         | nc    | nc     | 2     | 0   |
| 8668   | nc    | nc         | 1.2   | nc     | 2/1   | 0   |
| 8669   | nc    | nc         | 1.2   | nc     | 2/1   | 0   |
| 8670   | nc    | nc         | 1.2   | nc     | 2/1   | 0   |
| 8671   | nc    | nc         | nc    | nc     | 2     | 0   |
| 8672   | nc    | nc         | nc    | nc     | 2     | 0   |
| 8673   | nc    | nc         | nc    | nc     | 2     | 0   |
| 8674   | 6-4-1 | 8.5.10poco | 8-1-8 | 85-8-9 | 1     | 1   |
| 8675   | 6-4-1 | 8.5.10poco | 8-1-8 | 85-8-9 | 1     | 0   |
| 8676   | 6-4-1 | 8.5.10poco | 8-1-8 | 85-8-9 | 1     | 1   |
| 8677   | nc    | nc         | nc    | nc     | 2     | 0   |
| 8678   | nc    | nc         | nc    | nc     | 2     | 0   |
| 8679   | nc    | 4.4/p      | nc    | nc     | 2     | 0   |
| 8680   | nc    | nc         | nc    | nc     | 2     | 0   |
| 8681   | nc    | nc         | nc    | nc     | 2     | 0   |
| 8682   | 2-3   | nc         | 1.5   | nc     | 2/1   | 0   |
| 8683   | nc    | nc         | nc    | nc     | 2     | 0   |
| 8684   | nc    | nc         | nc    | nc     | 2     | 0   |
| 8685   | nc    | nc         | nc    | nc     | 1/2   | 0   |
| 8686   |       | 9.6.9poco  | 8-1-8 | nc     | 2/1   | 0   |
| 8687   | nc    | nc         | nc    | nc     | 1/2   | nc  |
| 8688   | nc    | nc         | nc    | nc     | nc    | nc  |
| 8689   | nc    | nc         | nc    | nc     | nc    | nc  |
| 8690   | nc    | nc         | nc    | nc     | 2     | 0   |
| 8691   | nc    | nc         | nc    | nc     | 2     | 0   |
| 8692   | nc    | nc         | nc    | nc     | nc    | nc  |
| 8693   | nc    | nc         | nc    | nc     | nc    | nc  |



| Strain | EMB   | VB         | MCK   | TCBS   | TSI   |     |
|--------|-------|------------|-------|--------|-------|-----|
|        | Color | Color      | Color | Color  | Color | Gas |
| 8694   | nc    | nc         | nc    | nc     | nc    | nc  |
| 8695   | nc    | nc         | nc    | nc     | nc    | nc  |
| 8696   | nc    | nc         | nc    | nc     | nc    | nc  |
| 8697   | nc    | nc         | nc    | nc     | 2     | 0   |
| 8698   | nc    | nc         | nc    | nc     | nc    | nc  |
| 8699   | nc    | nc         | nc    | nc     | nc    | nc  |
| 8700   | nc    | nc         | nc    | nc     | nc    | nc  |
| 8701   | 6-5-6 | 6-1-4      | 7-4-8 | 6-4-13 | 2     | 0   |
| 8702   | nc    | nc         | nc    | nc     | 1     | 0   |
| 8703   | nc    | nc         | nc    | nc     | 2     | 0   |
| 8704   | 6-5-6 | 6-1-4      | 7-4-8 | 6-4-13 | 2     | 0   |
| 8705   | 6-5-6 | 6-1-4      | 7-4-8 | 6-4-13 | 2     | 0   |
| 8706   | 6-5-6 | 6-1-4      | 7-4-8 | 6-4-13 | 2     | 0   |
| 8707   | 6-5-6 | 6-1-4      | 7-4-8 | 6-4-13 | 1.2   | 0   |
| 8708   | 6-5-6 | 6-1-4      | 7-4-8 | 6-4-13 | 2     | 0   |
| 8709   | 6-5-6 | 6-1-4      | 7-4-8 | 6-4-13 | 2     | 0   |
| 8710   | 6-5-6 | 6-1-4      | 7-4-8 | 6-4-13 | 2     | 0   |
| 8711   | 6-5-6 | 6-1-4      | 7-4-8 | 6-4-13 | 2     | 0   |
| 8712   | 6-5-6 | 6-1-4      | 7-4-8 | 6-4-13 | 2     | 0   |
| 8713   | 6-5-6 | 6-1-4      | 7-4-8 | 6-4-13 | 2     | 0   |
| 8714   | 6-5-6 | 6-1-4      | 7-4-8 | 6-4-13 | 2     | 0   |
| 8715   | 6-5-6 | 6-1-4      | 7-4-8 | 6-4-13 | 2     | 0   |
| 8716   | 6-5-6 | 6-1-4      | 7-4-8 | 6-4-13 | 2     | 0   |
| 8717   | 6-5-6 | 6-1-4      | 7-4-8 | 6-4-13 | 2     | 0   |
| 8718   | 6-5-6 | 6-1-4      | 7-4-8 | 6-4-13 | 2     | 0   |
| 8719   | 6-5-6 | 6-1-4      | 7-4-8 | 6-4-13 | 2     | 0   |
| 8720   | n.c   | 6.5.11poco | 7-2-1 | 75-7-8 | 1     | 0   |
| 8721   | n.c   | 6.5.11poco | 7-2-1 | 75-7-8 | 1     | 0   |
| 8722   | n.c   | 6.5.11poco | 7-2-1 | 75-7-8 | 1     | 0   |
| 8723   | n.c   | 6.5.11poco | 7-2-5 | 75-7-8 | 1     | 0   |
| 8724   | n.c   | 6.5.11poco | 7-2-1 | 75-7-8 | 1     | 0   |
| 8725   | 4-4-1 | 6.1.4poco  | 7-4-8 | nc     | 3     | 0   |
| 8726   | n.c   | 6.5.11poco | 7-2-1 | 75-7-8 | 1     | 0   |
| 8727   | n.c   | 7-5-11     | nc    | 85-7-8 | 1     | 0   |

| Strain | EMB    | VB      | MCK   | TCBS    | TSI   |     |
|--------|--------|---------|-------|---------|-------|-----|
|        | Color  | Color   | Color | Color   | Color | Gas |
| 8728   | 4-4-35 | 7-5-11  | 7-4-7 | 85-7-8  | 3     | 0   |
| 8729   | 4-4-35 | 6-3-10  | 7-4-7 | nc      | 3     | 0   |
| 8730   | 6-3-35 | 7.5.11  | 7-3-2 | 85-7-8  | 1     | 0   |
| 8731   | nc     | nc      | 2-1   | 85-7-8  | 1     | 0   |
| 8732   | nc     | nc      | 2-1   | 85-7-8  | 1     | 0   |
| 8733   | 4-4-35 | 6-3-10  | 7-4-7 | nc      | 3     | 0   |
| 8734   | 6-3-35 | nc      | 7-4-7 | nc      | 3     | 0   |
| 8735   | 7-3-35 | 95-3-10 | 7-3-1 | 85-7-8  | 3     | 1   |
| 8736   | 7-2-35 | 6-3-10  | 7-2-7 | 5-3-13  | 2     | 0   |
| 8737   | 7-2-35 | 6-3-10  | 7-2-7 | 5-3-13t | 2     | 0   |
| 8738   | 7-2-35 | 6-3-10  | 7-2-7 | 5-3-13  | 2     | 0   |
| 8739   | 7-2-35 | 6-3-10  | 7-2-7 | 5-3-13  | 2     | 0   |
| 8740   | 7-4-35 | 7-3-6   | 7-2-7 | 5-3-13  | 2     | 0   |
| 8741   | 7-2-35 | 6-3-10  | 7-2-7 | 5-3-13  | 2     | 0   |
| 8742   | 7-2-35 | 8-10-35 | 7-2-7 | 5-3-13  | 2     | 0   |
| 8743   | 7-2-35 | 6-3-10  | 7-2-7 | 5-3-13  | 2     | 0   |
| 8744   | 7-2-35 | 6-3-10  | 7-2-7 | 5-3-13  | 2     | 0   |
| 8745   | 7-2-35 | 6-3-10  | 7-2-7 | 5-3-13  | 2     | 0   |
| 8746   | 7-4-10 | 7-3-6   | 7-2-7 | 5-3-13  | 2     | 0   |
| 8747   | 7-4-10 | 7-3-6   | 7-2-7 | 5-3-13  | 2     | 0   |
| 8748   | 7-2-35 | 6-3-10  | 7-2-7 | 5-3-13  | 2     | 0   |
| 8749   | 7-2-35 | 6-3-10  | 7-4-7 | 5-3-13  | 2     | 0   |
| 8750   | 7-2-35 | 6-3-10  | 7-4-7 | 5-3-13  | 2     | 0   |
| 8751   | 7-4-10 | 7-3-6   | 7-4-7 | nc      | 1     | 1   |
| 8752   | 7-2-35 | 7-3-6   | 7-4-7 | 85-7-8  | 1     | 0   |
| 8753   | nc     | nc      | nc    | nc      | 2     | 0   |
| 8754   | nc     | nc      | nc    | nc      | nc    | nc  |
| 8755   | nc     | nc      | nc    | nc      | 2     | 0   |
| 8756   | 7-3-1  | 95-1-11 | 7-2-3 | 5-3-13  | 2     | 0   |
| 8757   | n.c    | 7-3-6   | 7-2-7 | 85-7-8  | 2     | 0   |
| 8758   | nc     | nc      | nc    | nc      | 2     | 0   |
| 8759   | 7-3-1  | 95-1-11 | 7-2-3 | 5-3-13  | 2     | 0   |
| 8760   | 7-3-1  | 95-1-11 | 7-2-3 | 5-3-13  | 2     | 0   |
| 8761   | nc     | nc      | nc    | nc      | 2     | 0   |

| Strain | EMB    | VB      | MCK   | TCBS   | TSI   |     |
|--------|--------|---------|-------|--------|-------|-----|
|        | Color  | Color   | Color | Color  | Color | Gas |
| 8762   | nc     | nc      | nc    | nc     | 2     | 0   |
| 8763   | 7-4-10 | 7-3-6   | 7-2-7 | nc     | 2     | 0   |
| 8764   | nc     | nc      | nc    | nc     | 2     | 0   |
| 8765   | nc     | nc      | nc    | nc     | 1/2   | 0   |
| 8766   | 7-3-1  | 7-4-35  | 7-2-3 | 5-3-13 | 2     | 0   |
| 8767   | 6-3-1  | 9-1-11  | 7-2-3 | 5-3-13 | 2     | 0   |
| 8768   | 6-3-1  | 9-1-11  | 7-2-3 | nc     | 2     | 0   |
| 8769   | 6-3-1  | 9-1-11  | 7-2-3 | 5-3-13 | 2     | 0   |
| 8770   | 6-3-1  | 9-1-11  | 7-2-3 | 5-3-13 | 2     | 0   |
| 8771   | 6-3-1  | 7-3-6   | 7-2-3 | nc     | 2     | 0   |
| 8772   | 6-3-1  | 7-3-6   | nc    | 5-3-13 | 2     | 0   |
| 8773   | 7-4-10 | 7-3-6   | nc    | nc     | 2     | 0   |
| 8774   | nc     | nc      | 2.1   | 85-7-8 | 1     | 0   |
| 8775   | nc     | nc      | 2.1   | 85-7-8 | 1     | 0   |
| 8776   | 7-4-10 | 7.3.6   | nc    | nc     | 2     | 0   |
| 8777   | 7-4-10 | 7-3-6   | nc    | nc     | 2     | 0   |
| 8778   | 7-4-10 | 7-3-6   | 7-2-7 | nc     | 2     | 0   |
| 8779   | 7.5    | 4.5     | 2.5   | nc     | 2/1   | 0   |
| 8780   | 7-4-10 | 4-5     | 7-2-7 | nc     | 2/1   | 0   |
| 8781   | 7-4-10 | 4-5     | nc    | nc     | 2/1   | 0   |
| 8782   | nc     | nc      | nc    | nc     | nc    | nc  |
| 8783   | 2-1    | nc      | nc    | nc     | 2     | 0   |
| 8784   | 4-2-36 | 7-5-11  | 7-2-7 | 85-7-8 | 2/1   | 1   |
| 8785   | 4-2-36 | nc      | 7-2-7 | 85-7-8 | 2/1   | 1   |
| 8786   | 4-2-36 | 7-5-11  | 7-2-7 | 85-7-8 | 2/1   | 1   |
| 8787   | 4-2-36 | nc      | 7-2-7 | 85-7-8 | 2/1   | 1   |
| 8788   | 4-2-36 | 7-5-11  | 7-2-7 | 85-7-8 | 2/1   | 1   |
| 8789   | 4-2-36 | 7-5-11  | 7-2-7 | 85-7-8 | 2/1   | 1   |
| 8790   | 4-2-36 | 7-5-11  | 7-2-7 | 85-7-8 | 2/1   | 1   |
| 8791   | nc     | nc      | nc    | nc     | 2     | 0   |
| 8792   | 4-2-36 | 7-5-11p | 7-2-7 | 85-7-8 | 2/1   | 1   |
| 8793   | 4-2-36 | 7-5-11p | 7-2-7 | 85-7-8 | 2/1   | 1   |
| 8794   | 4-2-36 | 7-5-11p | 7-2-7 | 85-7-8 | 2/1   | 1   |
| 8795   | 4-2-36 | 7-5-11p | 7-2-7 | 85-7-8 | 2/1   | 1   |

| Strain | EMB    | VB      | MCK   | TCBS   | TSI   |     |
|--------|--------|---------|-------|--------|-------|-----|
|        | Color  | Color   | Color | Color  | Color | Gas |
| 8796   | 4-2-36 | 7-5-11p | 7-2-7 | 85-7-8 | 2/1   | 1   |
| 8797   | 4-2-36 | 7-5-11p | 7-2-7 | 85-7-8 | 2/1   | 1   |
| 8798   | 4-2-36 | 7-5-11p | 7-2-7 | 85-7-8 | 2/1   | 1   |
| 8799   | nc     | nc      | nc    | nc     | 2     | 0   |
| 8800   | 7-4-10 | nc      | 7-2-7 | nc     | 2     | 0   |
| 8801   | 7-4-10 | nc      | 7-2-7 | nc     | 2     | 0   |
| 8802   | nc     | nc      | nc    | nc     | 2     | 0   |
| 8803   | 7-4-10 | 7-3-6   | 7-2-7 | nc     | 2     | 0   |
| 8804   | 7-4-10 | 7-3-6   | 7-2-7 | nc     | 2     | 0   |
| 8805   | 7-4-10 | 7-3-6   | 7-2-7 | nc     | 2     | 0   |
| 8806   | 2.5    | 4.5     | nc    | nc     | 2     | 0   |
| 8807   | nc     | nc      | nc    | nc     | 2     | 0   |
| 8808   | nc     | 75-3-36 | 7-2-7 | nc     | nc    | nc  |
| 8809   | 7-4-10 | 7-3-6   | 7-2-7 | nc     | 2     | 0   |
| 8810   | 7-4-10 | 7-3-6   | 7-2-7 | nc     | 2     | 0   |
| 8811   | 7-4-10 | 7-3-6   | 7-2-7 | nc     | 2     | 0   |
| 8812   | nc     | nc      | nc    | nc     | nc    | nc  |
| 8813   | 7-4-10 | nc      | 7-2-7 | nc     | 2     | 0   |
| 8814   | 7-4-10 | nc      | 7-2-7 | nc     | 2     | 0   |
| 8815   | nc     | nc      | nc    | nc     | 2     | 0   |
| 8816   | nc     | nc      | nc    | nc     | nc    | nc  |
| 8817   | nc     | nc      | nc    | nc     | nc    | nc  |
| 8818   | nc     | nc      | nc    | nc     | nc    | nc  |
| 8819   | nc     | nc      | nc    | nc     | 2     | 0   |
| 8820   | nc     | nc      | nc    | nc     | nc    | nc  |
| 8821   | nc     | nc      | nc    | nc     | nc    | nc  |
| 8822   | nc     | nc      | nc    | nc     | nc    | nc  |
| 8823   | nc     | nc      | nc    | nc     | nc    | nc  |
| 8824   | nc     | nc      | nc    | nc     | nc    | nc  |
| 8825   | nc     | nc      | nc    | nc     | nc    | nc  |
| 8826   | nc     | nc      | nc    | nc     | nc    | nc  |
| 8827   | nc     | nc      | nc    | nc     | nc    | nc  |
| 8828   | nc     | nc      | nc    | nc     | nc    | nc  |
| 8829   | nc     | nc      | nc    | nc     | nc    | nc  |

| Strain | EMB     | VB       | MCK    | TCBS   | TSI   |     |
|--------|---------|----------|--------|--------|-------|-----|
|        | Color   | Color    | Color  | Color  | Color | Gas |
| 8830   | nc      | nc       | nc     | nc     | 2     | 0   |
| 8831   | nc      | nc       | nc     | nc     | 2     | 0   |
| 8832   | 1-7-10  | 7-3-6    | 5-3-5  | nc     | 2     | 0   |
| 8833   | 6-5-1   | 9-6-9 p  | 8-3-7  | 85-7-8 | 3     | 0   |
| 8834   | 7-4-10  | 9-1-33   | 8-2-6  | nc     | 2     | 0   |
| 8835   | nc      | nc       | nc     | nc     | 2     | 0   |
| 8836   | 7-4-10  | 8-2-36   | 8-3-7  | nc     | 2     | 0   |
| 8837   | 6-5-1   | 9-6-9 p  | 8-3-7  | 85-7-8 | 1     | 1   |
| 8838   | nc      | nc       | nc     | nc     | 2     | 0   |
| 8839   | nc      | nc       | nc     | nc     | 2     | 0   |
| 8840   | nc      | 8-2-36   | 5-3-5  | nc     | 2     | 0   |
| 8841   | nc      | nc       | nc     | nc     | 2     | 0   |
| 8842   | 7-4-10  | 9-1-33   | 8-2-6  | nc     | 2     | 0   |
| 8843   | 7-2-35  | 7-3-6    | 5-3-5  | nc     | 2     | 0   |
| 8844   | nc      | nc       | nc     | nc     | 2     | 0   |
| 8845   | nc      | nc       | nc     | nc     | 2     | 0   |
| 8846   | 7-2-36  | 7-1-33   | 5-3-3  | nc     | 2     | 0   |
| 8847   | 7-4-10  | 9-1-33   | 5-3-5  | 85-7-8 | 1     | 1   |
| 8848   | nc      | 8-85-1 p | 8-1-35 | 85-7-8 | 1     | 0   |
| 8849   | nc      | 8-85-1 p | 8-1-35 | 85-7-8 | 1     | 0   |
| 8850   | 7-4-10  | 8-85-1 p | 8-1-35 | 85-7-8 | 1     | 0   |
| 8851   | nc      | 8-85-1 p | 8-1-35 | 85-7-8 | 1     | 0   |
| 8852   | 7-4-10  | 9-1-33   | 8-3-7  | nc     | 2     | 0   |
| 8853   | 7-4-10  | 9-1-33   | 8-3-7  | nc     | 2     | 0   |
| 8854   | 7-4-10  | 9-1-33   | 8-3-7  | nc     | 2     | 0   |
| 8855   | 7-4-10  | 9-1-33   | 8-3-7  | nc     | 2     | 0   |
| 8856   | nc      | nc       | nc     | nc     | 2     | 0   |
| 8857   | nc      | nc       | nc     | nc     | 2     | 0   |
| 8858   | nc      | 8.85.10p | 8-1-35 | 85-7-8 | 1     | 0   |
| 8859   | nc      | 8.85.10p | 8-1-35 | 85-7-8 | 1     | 0   |
| 8860   | 1.3c1.1 | 8.85.10p | 8-1-35 | 85-7-8 | 1     | 1   |
| 8861   | nc      | 8.85.10p | 8-1-35 | 85-7-8 | 1     | 0   |
| 8862   | nc      | 8.85.10p | 8-1-35 | 85-7-8 | 1     | 0   |
| 8863   | 5-4-36p | 8-2-15p  | 6-5-2  | 6-3-15 | 2/1   | 1   |

| Strain | EMB      | VB        | MCK    | TCBS   | TSI   |     |
|--------|----------|-----------|--------|--------|-------|-----|
|        | Color    | Color     | Color  | Color  | Color | Gas |
| 8864   | nc       | 8-85-10 p | 8-1-35 | 85-7-8 | 1     | 0   |
| 8865   | nc       | 8-85-10 p | 8-1-35 | 85-7-8 | 1     | 0   |
| 8866   | 5-4-36 p | 8-2-15p   | 6-5-2  | 6-3-15 | 2/1   | 0   |
| 8867   | nc       | 8-85-10 p | 8-1-35 | 6-3-15 | 1     | 0   |
| 8868   | nc       | 8-85-10 p | 8-1-35 | 6-3-15 | 1     | 0   |
| 8869   | nc       | 8-85-10 p | 8-1-35 | 6-3-15 | 1     | 0   |
| 8870   | nc       | 8-85-10 p | 8-1-35 | 6-3-15 | 1     | 0   |
| 8871   | nc       | 8-85-10 p | 8-1-35 | 6-3-15 | 1     | 0   |
| 8872   | nc       | 8-85-10 p | 8-1-35 | 6-3-15 | 1     | 0   |
| 8873   | nc       | 8-85-10 p | 8-1-35 | 6-3-15 | 1     | 0   |
| 8874   | nc       | 8-85-10 p | 8-1-35 | 6-3-15 | 1     | 0   |
| 8875   | nc       | 8-85-10 p | 8-1-35 | 6-3-15 | 1     | 0   |
| 8876   | nc       | 8-85-10 p | 8-1-35 | 6-3-15 | nc    | nc  |
| 8877   | nc       | nc        | nc     | nc     | 2     | 0   |
| 8878   | nc       | nc        | nc     | nc     | nc    | nc  |
| 8879   | nc       | nc        | nc     | nc     | nc    | nc  |
| 8880   | nc       | nc        | nc     | nc     | nc    | nc  |
| 8881   | nc       | nc        | nc     | nc     | nc    | nc  |
| 8882   | nc       | nc        | nc     | nc     | nc    | nc  |
| 8883   | nc       | nc        | nc     | nc     | nc    | nc  |
| 8884   | nc       | nc        | nc     | nc     | nc    | nc  |
| 8885   | nc       | nc        | nc     | nc     | nc    | nc  |
| 8886   | nc       | nc        | nc     | nc     | nc    | nc  |
| 8887   | nc       | nc        | nc     | nc     | nc    | nc  |
| 8888   | nc       | nc        | nc     | nc     | nc    | nc  |
| 8889   | nc       | nc        | nc     | nc     | nc    | nc  |
| 8890   | nc       | nc        | nc     | nc     | nc    | nc  |
| 8891   | nc       | nc        | nc     | nc     | nc    | nc  |
| 8892   | nc       | nc        | nc     | nc     | nc    | nc  |
| 8893   | 6-4-1    | nc        | 8-3-7  | 85-7-8 | nc    | nc  |
| 8894   | nc       | nc        | nc     | nc     | 2     | 0   |
| 8895   | nc       | nc        | nc     | nc     | 2     | 0   |
| 8896   | 7-4-2    | 9-4-10    | 8-3-7  | 85-7-8 | 2     | 0   |
| 8897   | nc       | nc        | nc     | nc     | 2     | 0   |

| Strain | EMB      | VB        | MCK    | TCBS   | TSI   |     |
|--------|----------|-----------|--------|--------|-------|-----|
|        | Color    | Color     | Color  | Color  | Color | Gas |
| 8898   | nc       | nc        | nc     | nc     | 2     | 0   |
| 8899   | nc       | nc        | nc     | nc     | 2     | 0   |
| 8900   | 1.3c1.1  | 9-6-9 p   | 8-3-7  | 85-7-8 | 2     | 0   |
| 8901   | 7-2-36   | 7-1-33    | 8-3-7  | nc     | 1     | 1   |
| 8902   | 6-5-1    | 9-4-10    | 8-3-7  | 85-7-8 | 1     | 1   |
| 8903   | 6-5-1    | nc        | 8-3-7  | 85-7-8 | 1     | 0   |
| 8904   | nc       | 85-2-5 p  | poco   | nc     | 2/1   | 0   |
| 8905   | 7-4-10   | 9-1-33    | poco   | nc     | 2     | 0   |
| 8906   | 7-4-10   | 9-1-33    | poco   | nc     | 2     | 0   |
| 8907   | 5-3-3    | 7-1-33    | 6-3-5  | nc     | 2     | 0   |
| 8908   | nc       | 8-85-10 p | 6-3-5  | 85-7-8 | 2     | 0   |
| 8909   | nc       | 8-85-10 p | 6-3-5  | 85-7-8 | 1     | 0   |
| 8910   | nc       | 8-85-10 p | 6-3-5  | 85-7-8 | 1     | 0   |
| 8911   | 4-2-36 p | 8-85-10 p | 5-3-4  | 85-7-8 | 1     | 0   |
| 8912   | 4-2-36 p | 8-85-10 p | 5-3-4  | 85-7-8 | 1     | 0   |
| 8913   | 4-2-36 p | 8-85-10 p | 5-3-4  | 85-7-8 | 1     | 0   |
| 8914   | 4-2-36 p | 8-85-10 p | 5-3-4  | 85-7-8 | 1     | 0   |
| 8915   | 4-2-36 p | 8-85-10 p | 5-3-4  | 85-7-8 | 1     | 0   |
| 8916   | 4-2-36 p | 8-85-10 p | 5-3-4  | 85-7-8 | 1     | 0   |
| 8917   | 4-2-36 p | 8-85-10 p | 5-3-4  | 85-7-8 | 1     | 0   |
| 8918   | 4-2-36 p | 8-85-10 p | 5-3-4  | 85-7-8 | 1     | 0   |
| 8919   | 4-2-36 p | 8-85-10 p | 5-3-4  | 85-7-8 | 1     | 0   |
| 8920   | 4-2-36   | 8-85-10 p | 7-4-7  | 85-7-8 | 1     | 0   |
| 8921   | 4-2-36 p | 8-85-10 p | 5-3-4  | 85-7-8 | 1     | 0   |
| 8922   | 4-2-36 p | 8-85-10 p | 5-3-4  | 85-7-8 | 1     | 0   |
| 8923   | 4-2-36 p | 8-85-10 p | 5-3-4  | 85-7-8 | 2/1   | 1   |
| 8924   | 2.3c1.1  | 85-4-13   | 5-3-4  | 9-3-8  | 2/1   | 1   |
| 8925   | 4-2-36 p | 8-85-10   | 75-3-2 | 5-3-13 | 2/1   | 1   |
| 8926   | 2.3c1.1  | 85-4-13   | 6-3-3  | 9-3-8  | 2/1   | 1   |
| 8927   | 4-2-36   | 85-4-13p  | 6-3-6  | 9-3-8  | 2/1   | 1   |
| 8928   | 4-2-36   | 85-4-13p  | 6-3-6  | 9-3-8  | 2/1   | 0   |
| 8929   | 4-2-36   | 85-4-13p  | 6-3-6  | 9-3-8  | 2/1   | 1   |
| 8930   | 4-2-36   | 85-4-13p  | 6-3-6  | 9-3-8  | 2/1   | 1   |
| 8931   | 4-2-36   | 85-4-13p  | 6-3-6  | 9-3-8  | 2/1   | 1   |

| Strain | EMB    | VB       | MCK   | TCBS     | TSI   |     |
|--------|--------|----------|-------|----------|-------|-----|
|        | Color  | Color    | Color | Color    | Color | Gas |
| 8932   | 4-2-36 | 85-4-13p | 6-3-6 | 9-3-8    | 2/1   | 1   |
| 8933   | 4-2-36 | 85-4-13p | 6-3-6 | 9-3-8    | 1     | 1   |
| 8934   | 4-2-36 | 85-4-13p | 6-3-6 | 9-3-8    | 2/1   | 1   |
| 8935   | nc     | 85-4-13p | 7-2-3 | 5-3-13   | 2/1   | 1   |
| 8936   | 4-2-36 | 85-4-13p | 6-3-6 | 9-3-8    | 2/1   | 1   |
| 8937   | 4-2-36 | 85-4-13  | 6-3-6 | 9-3-8    | 2/1   | 1   |
| 8938   | 4-2-36 | 85-4-13p | 6-3-6 | 9-3-8    | 2/1   | 1   |
| 8939   | 8-1-2  | 7-2-3 p  | 7-2-5 | 9-3-8    | 2     | 0   |
| 8940   | 8-1-2  | 7-2-3    | 7-2-5 | 9-3-8    | 2     | 0   |
| 8941   | 7-4-10 | 7-2-3    | 7-4-8 | 9-3-8    | 2     | 0   |
| 8942   | 7-4-10 | 7-2-3    | 7-4-8 | 9-3-8    | 2     | 0   |
| 8943   | 7-4-10 | 7-2-3    | 7-4-8 | nc       | 2     | 0   |
| 8944   | 7-4-10 | 7-2-3    | 7-4-8 | nc       | 2/1   | 0   |
| 8945   | 8-1-2  | 7-2-3    | 7-4-8 | nc       | 2     | 0   |
| 8946   | 7-4-10 | 7-2-3    | 7-4-8 | nc       | 2     | 0   |
| 8947   | 8-1-2  | 7-2-3    | 7-4-8 | nc       | 2     | 0   |
| 8948   | 8-1-2  | 7-2-3    | 7-4-8 | nc       | 2     | 0   |
| 8949   | 7-4-10 | 7-2-3    | 7-4-8 | nc       | 2     | 0   |
| 8950   | 7-4-10 | 7-2-3    | 7-4-8 | nc       | 2     | 0   |
| 8951   | 8-1-2  | 7-2-3    | 7-4-8 | nc       | 2/1   | 0   |
| 8952   | 7-4-10 | 7-2-3    | 7-4-8 | nc       | 2     | 0   |
| 8953   | 7-4-10 | 7-2-3    | 7-4-8 | nc       | 2     | 0   |
| 8954   | 8-1-2  | 7-2-3    | 7-4-8 | 6-3-18 p | 2     | 0   |
| 8955   | 8-1-2  | 7-2-3    | 7-4-8 | 6-3-18 p | 2     | 0   |
| 8956   | 8-1-2  | 7-2-3    | 7-4-8 | 6-3-18 p | 2     | 0   |
| 8957   | 8-1-2  | 7-2-3    | 7-4-8 | nc       | 2     | 0   |
| 8958   | 8-1-2  | 7-2-3    | 7-4-8 | nc       | 2     | 0   |
| 8959   | 8-1-2  | 7-2-3    | 7-4-8 | nc       | 2     | 0   |
| 8960   | 8-1-2  | 7-2-3    | 7-4-8 | 6-3-18 p | 2     | 0   |
| 8961   | 8-1-2  | 7-2-3    | 7-4-8 | 6-3-18 p | 2     | 0   |
| 8962   | 8-1-2  | 7-2-3    | 7-4-8 | 6-3-18 p | 2     | 0   |
| 8963   | 8-1-2  | 7-2-3    | 7-4-8 | 6-3-18 p | 2     | 0   |
| 8964   | 8-1-2  | 7-2-3    | 7-4-8 | 6-3-18 p | 2     | 0   |
| 8965   | 8-1-2  | 7-2-3    | 7-4-8 | 6-3-18 p | 2     | 0   |



| Strain | EMB   | VB      | MCK   | TCBS      | TSI   |     |
|--------|-------|---------|-------|-----------|-------|-----|
|        | Color | Color   | Color | Color     | Color | Gas |
| 8966   | 8-1-2 | 7-2-3   | 7-4-8 | 6-3-18 p  | 2     | 0   |
| 8967   | 8-1-2 | 7-2-3   | 7-4-8 | 6-3-18 p  | 2     | 0   |
| 8968   | 8-1-2 | 7-2-3   | 7-4-8 | 6-3-18 p  | 2     | 0   |
| 8969   | 8-1-2 | 7-2-3   | 7-4-8 | 6-3-18 p  | 2     | 0   |
| 8970   | 8-1-2 | 7-2-3   | 7-4-8 | 6-3-18 p  | 2     | 0   |
| 8971   | nc    | nc      | nc    | nc        | 2/1   | 0   |
| 8972   | 8-1-2 | 7-2-3   | nc    | 9-3-8     | 1     | 0   |
| 8973   | 6-4-1 | nc      | 8-1-2 | 9-3-8     | 2     | 0   |
| 8974   | nc    | 7-2-3   | nc    | 9-3-8     | 2/1,1 | 0   |
| 8975   | 6-4-1 | nc      | 8-1-2 | 9-3-8     | 1     | 0   |
| 8976   | 7-1-2 | 7-2-3   | 7-4-8 | nc        | 1     | 0   |
| 8977   | 2.5   | 1.6     | 1.5   | nc        | 2     | 0   |
| 8978   | 7-1-2 | 7-2-3   | 7-4-8 | nc        | 2     | 0   |
| 8979   | 7-1-2 | 7-2-3   | 7-4-8 | nc        | 2     | 0   |
| 8980   | 7-1-2 | 7-2-3   | 7-4-8 | nc        | 2     | 0   |
| 8981   | 6-4-1 | nc      | 8-1-2 | 9-3-8     | 1     | 0   |
| 8982   | 7-1-2 | 7-2-3   | 7-4-8 | nc        | 2     | 0   |
| 8983   | 7-1-2 | 7-2-3   | 7-4-8 | nc        | 2     | 0   |
| 8984   | 7-1-2 | 7-2-3   | 8-1-2 | nc        | 2     | 0   |
| 8985   | 6-4-1 | nc      | 1.3   | nc        | 1     | 0   |
| 8986   | 7-1-2 | 7-2-3   | 1-6-3 | 9-3-8     | 2/1   | 0   |
| 8987   | 2.5   | 1-6     | 1-5   | nc        | 2     | 0   |
| 8988   | 2.2   | 2.6     | 1.5   | 5.6 de VB | 1     | 0   |
| 8989   | nc    | 5-5     | 3-5   | 5.6 de VB | 1     | 0   |
| 8990   | nc    | 5-5     | 3-5   | 5.6 de VB | 1     | 0   |
| 8991   | nc    | 8-85-10 | 8-2-6 | 5.6 de VB | 1     | 0   |
| 8992   | nc    | 5-5     | 3-5   | 5.6 de VB | 2/1   | 0   |
| 8993   | nc    | 5-5     | 3-5   | 5.6 de VB | 2/1   | 0   |
| 8994   | nc    | 5-5     | 3-5   | 5.6 de VB | 1     | 0   |
| 8995   | nc    | nc      | nc    | nc        | 2     | 0   |
| 8996   | nc    | nc      | nc    | nc        | 2     | 0   |
| 8997   | nc    | 8-85-10 | 8-2-6 | nc        | 1     | 0   |
| 8998   | nc    | 5-5     | 3-5   | 5.6 de VB | 2/1   | 0   |
| 8999   | nc    | 8-85-10 | 7-4-7 | nc        | 1     | 0   |

| Strain | EMB      | VB        | MCK     | TCBS      | TSI   |     |
|--------|----------|-----------|---------|-----------|-------|-----|
|        | Color    | Color     | Color   | Color     | Color | Gas |
| 9000   | nc       | nc        | nc      | nc        | 1/2   | 0   |
| 9001   | 2.4c1.1  | 9-5-10    | 85-2-4  | 85-5-8    | 2/1   | 1   |
| 9002   | 6-2-36 p | 95-3-10 p | 8-3-7   | 3-2.5-9   | 3     | 0   |
| 9003   | 6-2-36 p | 95-3-10 p | 8-2-6 p | 3-2.5-9   | 3     | 0   |
| 9004   | 8-1-35 p | 95-3-10 p | 8-2-6 p | 8-8-9     | 1     | 1   |
| 9005   | 8-2-5    | 7-1-35    | 8-3-9p  | 8-8-9     | 1     | 0   |
| 9006   | nc       | nc        | nc      | 5.6 de VB | 1     | 0   |
| 9007   | 6-5-1    | 7-3-1     | 8-3-7   | 5.6 de VB | 2/1   | 0   |
| 9008   | 7-2-2    | 75-3-2    | 85-2-4  | nc        | 2     | 0   |
| 9009   | 7-2-2    | 75-3-2    | 85-2-4  | nc        | 2     | 0   |
| 9010   | nc       | 9-5-9     | nc      | 5.6 de VB | 1/2   | 0   |
| 9011   | 5-4-1    | 9-6-10    | 6-5-34  | nc        | 3     | 1   |
| 9012   | nc       | 5-5       | 3-5     | nc        | 1     | 0   |
| 9013   | 7-2-5    | 8-3-8     | 7-4-7   | nc        | 2     | 0   |
| 9014   | nc       | 8-5-8     | nc      | 8-8-9     | 1     | 0   |
| 9015   | 1.4      | 3.4       | 1.5     | nc        | 2     | 0   |
| 9016   | nc       | nc        | nc      | nc        | nc    | nc  |
| 9017   | 7-3-6    | 6-4-7     | 8-3-7   | 8-8-9     | 1     | 0   |
| 9018   | 7-3-6    | 6-4-7     | 8-3-7   | nc        | 2     | 0   |
| 9019   | 7-3-6    | 6-4-7     | 8-2-6/p | 85-5-8    | 1     | 0   |
| 9020   | 7-3-6    | 6-4-7     | 8-3-7   | nc        | 2/1   | 0   |
| 9021   | nc       | nc        | nc      | nc        | 2/1   | 0   |
| 9022   | nc       | nc        | 1.2     | 5.6 de VB | 1/2   | 0   |
| 9023   | nc       | nc        | nc      | nc        | 2     | 0   |
| 9024   | nc       | nc        | nc      | nc        | 2     | 0   |
| 9025   | nc       | nc        | nc      | nc        | nc    | nc  |
| 9026   | nc       | nc        | nc      | nc        | nc    | nc  |
| 9027   | nc       | nc        | nc      | nc        | nc    | nc  |
| 9028   | 6-2-36/p | 95-3-10   | 8-3-7   | nc        | 3     | 0   |
| 9029   | 6-2-36   | 95-3-10   | 8-3-7   | 3-2.5-9   | 3     | 0   |
| 9030   | nc       | nc        | nc      | nc        | nc    | nc  |
| 9031   | 8-1-35   | 7-1-35    | 8-3-7   | nc        | 3     | 0   |
| 9032   | nc       | nc        | nc      | nc        | nc    | nc  |
| 9033   | nc       | nc        | nc      | nc        | nc    | nc  |

| Strain | EMB     | VB      | MCK    | TCBS  | TSI   |     |
|--------|---------|---------|--------|-------|-------|-----|
|        | Color   | Color   | Color  | Color | Color | Gas |
| 9034   | nc      | nc      | nc     | nc    | 2     | 0   |
| 9035   | 6.2c1.2 | nc      | nc     | nc    | 2/1   | 0   |
| 9036   | nc      | nc      | nc     | nc    | 2     | 0   |
| 9037   | 8-1-35  | 7-1-35  | 8-3-7  | nc    | 2     | 0   |
| 9038   | 8-1-35  | 7-1-35  | 8-3-7  | nc    | 2     | 0   |
| 9039   | 8-1-35  | 7-1-35  | 8-3-7  | nc    | 2     | 0   |
| 9040   | nc      | nc      | nc     | nc    | nc    | nc  |
| 9041   | nc      | nc      | nc     | nc    | nc    | nc  |
| 9042   | 8-1-35  | 7-1-35  | 8-3-7  | nc    | 2     | 0   |
| 9043   | 8-1-35  | 7-1-35  | 8-3-7  | nc    | 2     | 0   |
| 9044   | 2.5     | 3.4     | 2.3    | nc    | 2     | 0   |
| 9045   | nc      | nc      | nc     | nc    | nc    | nc  |
| 9046   | nc      | nc      | nc     | nc    | nc    | nc  |
| 9047   | nc      | nc      | nc     | nc    | nc    | nc  |
| 9048   | nc      | nc      | nc     | nc    | nc    | nc  |
| 9049   | nc      | nc      | nc     | nc    | nc    | nc  |
| 9050   | nc      | nc      | nc     | nc    | nc    | nc  |
| 9051   | nc      | nc      | nc     | nc    | nc    | nc  |
| 9052   | nc      | nc      | nc     | nc    | nc    | nc  |
| 9053   | nc      | nc      | nc     | nc    | nc    | nc  |
| 9054   | nc      | nc      | nc     | nc    | nc    | nc  |
| 9055   | nc      | nc      | nc     | nc    | nc    | nc  |
| 9056   | nc      | nc      | nc     | nc    | nc    | nc  |
| 9057   | nc      | nc      | nc     | nc    | nc    | nc  |
| 9058   | nc      | nc      | nc     | nc    | nc    | nc  |
| 9059   | nc      | nc      | nc     | nc    | nc    | nc  |
| 9060   | 7-4-1   | 75-5-15 | 8-1-33 | nc    | 2/1   | 0   |
| 9061   | 7-4-1   | nc      | 8-1-33 | nc    | 2/1   | 0   |
| 9062   | 7-4-1   | nc      | 8-1-33 | nc    | 2/1   | 0   |
| 9063   | 7-4-1   | 75-5-15 | 8-1-33 | nc    | 2/1   | 0   |
| 9064   | 7-4-1   | nc      | 8-1-33 | nc    | 2/1   | 0   |
| 9065   | 7-4-1   | nc      | 8-1-33 | nc    | 2/1   | 0   |
| 9066   | 7-4-1   | nc      | 8-1-33 | nc    | 2/1   | 0   |
| 9067   | 7-4-1   | nc      | 8-1-33 | nc    | 2/1   | 0   |

| Strain | EMB         | VB     | MCK    | TCBS  | TSI   |     |
|--------|-------------|--------|--------|-------|-------|-----|
|        | Color       | Color  | Color  | Color | Color | Gas |
| 9068   | 7-4-1       | nc     | 8-1-33 | nc    | 2/1   | 0   |
| 9069   | 7-4-1       | nc     | 8-1-33 | nc    | 2/1   | 0   |
| 9070   |             | nc     | 8-1-33 | nc    | 2/1   | 0   |
| 9071   | 7-4-1       | nc     | 8-1-33 | 9-4-8 | 2/1   | 0   |
| 9072   | 7-4-1       | nc     | 8-1-33 | 9-4-8 | 2/1   | 0   |
| 9073   | 7-4-1       | nc     | 8-1-33 | 9-4-8 | 2/1   | 0   |
| 9074   | 7-4-1       | nc     | 8-1-33 | 9-4-8 | 2/1   | 0   |
| 9075   | nc          | nc     | nc     | nc    | 2     | 0   |
| 9076   | nc          | nc     | nc     | nc    | 2     | 0   |
| 9077   | nc          | nc     | nc     | nc    | 2     | 0   |
| 9078   | nc          | nc     | nc     | nc    | 2     | 0   |
| 9079   | nc          | nc     | nc     | nc    | 2     | 0   |
| 9080   | nc          | nc     | nc     | nc    | 2     | 0   |
| 9081   | nc          | nc     | nc     | nc    | 2     | 0   |
| 9082   | 8-1-35      | 7-1-35 | 8-3-7  | nc    | 2     | 0   |
| 9083   | 8-1-35      | 7-1-35 | 8-3-7  | nc    | 2     | 0   |
| 9084   | nc          | nc     | nc     | nc    | 2     | 0   |
| 9085   | nc          | nc     | nc     | nc    | 2     | 0   |
| 9086   | nc          | nc     | nc     | nc    | 2     | 0   |
| 9087   | nc          | nc     | nc     | nc    | 2     | 0   |
| 9088   | nc          | nc     | nc     | nc    | 2     | 0   |
| 9089   | nc          | nc     | nc     | nc    | 2     | 0   |
| 9090   | nc          | nc     | nc     | nc    | 2     | 0   |
| 9091   | 2.5c1.1     | nc     | 2-5    | nc    | 1     | 0   |
| 9092   | contaminada | 2-6    | 2-3    | nc    | 2     | 0   |
| 9093   | 2-3         | 2-6    | 1-5    | nc    | 1     | 0   |
| 9094   | contaminada | 2-6    | 2-5    | 9-6-9 | 1     | 0   |
| 9095   | 2-3         | nc     | 1-5    | nc    | 1     | 0   |
| 9096   | contaminada | 2-6    | 2-3    | nc    | 2     | 0   |
| 9097   | contaminada | 2-6    | 2-3    | nc    | 1     | 0   |
| 9098   | contaminada | 2-6    | 2-5    | nc    | 1     | 0   |
| 9099   | 2-3         | 2-6    | 2-5    | nc    | 1     | 0   |
| 9100   | contaminada | 2-6    | 2-5    | nc    | 1     | 0   |
| 9101   | contaminada | 2-6    | 2-5    | 9-6-9 | 2/1   | 0   |

| Strain | EMB         | VB    | MCK   | TCBS  | TSI   |     |
|--------|-------------|-------|-------|-------|-------|-----|
|        | Color       | Color | Color | Color | Color | Gas |
| 9102   | contaminada | 2-6   | 2-3   | nc    | 2     | 0   |
| 9103   | 1-3         | 6-7   | 2-5   | nc    | 1     | 1   |
| 9104   | 2.5c1.3     | 5-8   | 2-5   | nc    | 2/1   | 1   |
| 9105   | 2.5c1.3     | 5-8   | 2-5   | nc    | 2/1   | 0   |
| 9106   | 2.5c1.3     | 1-6   | 2-5   | nc    | 2/1   | 0   |
| 9107   | nc          | nc    | nc    | nc    | 2     | 0   |
| 9108   | nc          | nc    | nc    | nc    | 2     | 0   |
| 9109   | nc          | nc    | nc    | nc    | 2     | 0   |
| 9110   | nc          | nc    | nc    | nc    | 2     | 0   |
| 9111   | nc          | nc    | nc    | nc    | 2     | 0   |
| 9112   | 2-5         | 1-6   | 2-5   | nc    | 2     | 0   |
| 9113   | nc          | nc    | nc    | nc    | 2     | 0   |
| 9114   | nc          | nc    | nc    | nc    | 2     | 0   |
| 9115   | nc          | nc    | nc    | nc    | nc    | nc  |
| 9116   | nc          | nc    | nc    | nc    | nc    | nc  |
| 9117   | nc          | nc    | nc    | nc    | 2     | 0   |
| 9118   | nc          | nc    | nc    | nc    | nc    | nc  |
| 9119   | 2-5         | 3.4   | 2-5   | nc    | 2     | 0   |
| 9120   | nc          | nc    | nc    | nc    | nc    | nc  |
| 9121   | nc          | nc    | nc    | nc    | nc    | nc  |
| 9122   | nc          | nc    | nc    | nc    | 2     | 0   |
| 9123   | nc          | nc    | nc    | nc    | 2     | 0   |
| 9124   | nc          | nc    | nc    | nc    | nc    | nc  |
| 9125   | nc          | nc    | nc    | nc    | nc    | nc  |
| 9126   | nc          | nc    | nc    | nc    | nc    | nc  |
| 9127   | nc          | nc    | nc    | nc    | nc    | nc  |
| 9128   | nc          | nc    | nc    | nc    | nc    | nc  |
| 9129   | nc          | nc    | nc    | nc    | nc    | nc  |
| 9130   | 2.4         | 3.4   | 2.3   | nc    | 2     | 0   |
| 9131   | 2-5         | 1-6   | nc    | nc    | 2     | 0   |
| 9132   | 2.5c1.3     | 5-8   | 2-5   | nc    | 1     | 1   |
| 9133   | 2.5c1.3     | 5-8   | 2-5   | nc    | 1     | 0   |
| 9134   | 2-3         | 5-8   | 1-5   | nc    | 2/1   | 0   |
| 9135   | 2-3         | 6-7   | 1-5   | nc    | 1     | 0   |

| Strain | EMB     | VB    | MCK   | TCBS  | TSI   |     |
|--------|---------|-------|-------|-------|-------|-----|
|        | Color   | Color | Color | Color | Color | Gas |
| 9136   | 2-3     | 6-7   | 1-5   | nc    | 1     | 0   |
| 9137   | 2-3     | 6-7   | 1-5   | nc    | 1     | 1   |
| 9138   | 2-3     | 6-7   | 1-5   | nc    | 1     | 0   |
| 9139   | 1-1     | 3-6   | 2-5   | nc    | 3     | 0   |
| 9140   | 1-1     | 6-7   | 2-5   | nc    | 1     | 0   |
| 9141   | 1-1     | 6-7   | 2-5   | nc    | 1     | 0   |
| 9142   | 1-1     | 6-7   | 2-5   | nc    | 1     | 0   |
| 9143   | 1-1     | 6-7   | 2-5   | nc    | 1     | 0   |
| 9144   | 1-1     | 6-7   | 2-5   | nc    | 1     | 0   |
| 9145   | 1-1     | 6-7   | 2-5   | nc    | 2/1   | 0   |
| 9146   | 1-1     | 6-7   | 2-5   | nc    | 1     | 0   |
| 9147   | 1-1     | 6-7   | 2-5   | nc    | 1     | 0   |
| 9148   | 1-1     | 6-7   | 2-5   | nc    | 1     | 0   |
| 9149   | 1-1     | 6-7   | 2-5   | nc    | 1     | 0   |
| 9150   | 1-1     | 6-7   | 2-5   | nc    | 1     | 0   |
| 9151   | 2-2     | nc    | 1-5   | nc    | 1     | 0   |
| 9152   | 2-2     | nc    | 1-5   | nc    | 1     | 0   |
| 9153   | 2-2     | nc    | 1-5   | nc    | 1     | 0   |
| 9154   | 2-2     | nc    | 1-5   | nc    | 1     | 0   |
| 9155   | 2-2     | nc    | 1-5   | nc    | 1     | 0   |
| 9156   | 1.3c1.1 | 2-6   | 1-5   | nc    | 1     | 0   |
| 9157   | 1.3c1.1 | 2-6   | 1-5   | nc    | 1     | 1   |
| 9158   | 1.3c1.1 | 2-6   | 1-5   | nc    | 1     | 0   |
| 9159   | 2-2     | 5-7   | 1-3   | nc    | 1     | 0   |
| 9160   | 1.3c1.1 | nc    | 2-1   | nc    | 1     | 1   |
| 9161   | 1.3c1.1 | nc    | 2-1   | nc    | 1     | 0   |
| 9162   | 1.3c1.1 | 5-8   | 1-5   | nc    | 2/1   | 0   |
| 9163   | 1.3c1.1 | 5-8   | 1-5   | nc    | 2/1   | 0   |
| 9164   | 1.3c1.1 | 5-7   | 1-5   | nc    | 1     | 1   |
| 9165   | 1.3c1.1 | 5-7   | 2-1   | nc    | 1     | 0   |
| 9166   | nc      | nc    | nc    | nc    | ?     | ?   |
| 9167   | 1-1     | nc    | 1-3   | nc    | 1     | 1   |
| 9168   | 1-1     | nc    | 1-3   | nc    | 1     | 0   |
| 9169   | 1-1     | nc    | 1-3   | nc    | 2/1   | 0   |

| Strain | EMB     | VB    | MCK   | TCBS  | TSI   |     |
|--------|---------|-------|-------|-------|-------|-----|
|        | Color   | Color | Color | Color | Color | Gas |
| 9170   | 1-1     | nc    | 1-3   | nc    | 2/1   | 0   |
| 9171   | 1-3     | nc    | 2-1   | nc    | 1/2   | 0   |
| 9172   | 1-2     | nc    | 2-1   | nc    | 1/2   | 0   |
| 9173   | 1-2     | nc    | 2-1   | nc    | 1/2   | 0   |
| 9174   | 1-3     | nc    | 2-1   | nc    | 1/2   | 0   |
| 9175   | 2.3c1.1 | 5-7   | 1-5   | nc    | 1     | 1   |
| 9176   | 1-1     | nc    | 1-2   | nc    | 1     | 1   |
| 9177   | 1-1     | nc    | 1-2   | nc    | 2/1   | 0   |
| 9178   | 1-1     | nc    | 1-2   | nc    | 2/1/2 | 0   |
| 9179   | 1-1     | nc    | 2-5   | nc    | 1/2   | 0   |
| 9180   | 1-1     | nc    | 1-2   | nc    | 2/1   | 0   |
| 9181   | 1-1     | 5-7   | 1-2   | nc    | 2/1   | 0   |
| 9182   | 1-1     | nc    | 1-2   | nc    | 1/2   | 0   |
| 9183   | 1-1     | nc    | 1-2   | nc    | 1/2   | 0   |
| 9184   | 1-1     | nc    | 1-2   | nc    | 1     | 0   |
| 9185   | 1-1     | nc    | 1-2   | nc    | 1     | 0   |
| 9186   | 2.2     | 5.7   | 2.1   | nc    | 1     | 0   |
| 9187   | 1.1     | nc    | 2.3   | nc    | 2/1   | 1   |
| 9188   | 1.1     | nc    | 1.3   | nc    | nc    | nc  |
| 9189   | 2.1     | 5.7   | 2.1   | nc    | 1     | 0   |
| 9190   | 1-1     | nc    | 1-2   | nc    | 2/1   | 0   |
| 9191   | 1-1     | nc    | 1-2   | nc    | 1     | 0   |
| 9192   | 1-1     | nc    | 1-2   | nc    | 1     | 0   |
| 9193   | 2-1     | nc    | 2-3   | nc    | 2/1   | 0   |
| 9194   | 2-1     | nc    | 2-3   | nc    | 2/1   | 0   |
| 9195   | 2-1     | nc    | 2-3   | nc    | 1     | 0   |
| 9196   | 2-1     | nc    | 2-3   | nc    | 2/1   | 0   |
| 9197   | 2-1     | nc    | 2-3   | nc    | 2/1   | 0   |
| 9198   | 2-1     | nc    | 2-3   | nc    | 2/1   | 0   |
| 9199   | 1-2     | nc    | 2-3   | nc    | 1/2   | 0   |
| 9200   | 1-2     | nc    | 2-3   | nc    | 2/1   | 0   |
| 9201   | 1.2c1.1 | nc    | 2-3   | nc    | 2/1   | 0   |
| 9202   | 1.2c1.1 | nc    | 2-3   | nc    | 2/1/2 | 0   |
| 9203   | 1.2c1.1 | nc    | 2-3   | nc    | 1     | 0   |

| Strain | EMB     | VB    | MCK     | TCBS  | TSI   |     |
|--------|---------|-------|---------|-------|-------|-----|
|        | Color   | Color | Color   | Color | Color | Gas |
| 9204   | 1.2c1.1 | nc    | 2-3     | nc    | 2/1/2 | 0   |
| 9205   | 1.2c1.1 | nc    | 2-3     | nc    | 1/2   | 0   |
| 9206   | 1-4     | nc    | 2-3     | nc    | 1/2   | 0   |
| 9207   | 1.2c1.1 | nc    | 2-3     | nc    | 1     | 0   |
| 9208   | 2.2c1.1 | nc    | 2-3     | nc    | 1     | 0   |
| 9209   | 2.2c1.1 | nc    | 1-3     | nc    | 1     | 0   |
| 9210   | 2.2c1.1 | nc    | 1-3     | nc    | 1     | 0   |
| 9211   | 1.1     | 5.7p  | 1.2     | nc    | 1     | 0   |
| 9212   | 2.2c1.1 |       | 1-3     | nc    | 1     | 0   |
| 9213   | 2.2c1.1 |       | 1-3     | nc    | 1     | 0   |
| 9214   | 2.2c1.1 |       | nc      | nc    | 1/2   | 0   |
| 9215   | 2.2c1.1 |       | nc      | nc    | 1/2   | 0   |
| 9216   | nc      |       | 1-3     | nc    | 1     | 0   |
| 9217   | 1.1     | 5.5   | 2.3     | nc    | 2/1   | 1   |
| 9218   | 2.2c1.1 |       | 2.3     | nc    | 1     | 0   |
| 9219   | 1.1     |       | 2.1     | nc    | 2     | 0   |
| 9220   | 1.1     | 5.5   | 2.3     | nc    | 2/1   | 1   |
| 9221   | 2.2c1.1 | 5.5   | 2.1     | nc    | 1     | 0   |
| 9222   | 1.1     | 5.5   | 2.3     | nc    | 1     | 0   |
| 9223   | 2.2c1.1 | 5-5   | 2.1     | nc    | 1     | 1   |
| 9224   | 1.1     | nc    | 2.1     | nc    | 1/2   | 0   |
| 9225   | 2.5     | 2.6   | 2.1     | nc    | 2     | 0   |
| 9226   | 2.5     | 2.6   | 2.1     | nc    | 2     | 0   |
| 9227   | 2.5     | 2.6   | 2.1     | nc    | 2     | 0   |
| 9228   | 2.5     | 2.6   | 2.1     | nc    | 2     | 0   |
| 9229   | 2.5     | 2.6   | 2.1     | nc    | 2     | 0   |
| 9230   | 2.5     | 2.6   | 2.1     | nc    | 2     | 0   |
| 9231   | 2.4     | 2.6   | 1.3     | nc    | 2     | 0   |
| 9232   | 2.4     | 2.6   | 3.5c1.3 | nc    | 2     | 0   |
| 9233   | 2.4     | 2.6   | 3.5c1.3 | nc    | 2     | 0   |
| 9234   | 2.4     | 2.6   | 3.5c1.3 | nc    | 2     | 0   |
| 9235   | 2.4     | 2.6   | 3.5c1.3 | nc    | 2     | 0   |
| 9236   | 2.4     | 2.6   | 3.5c1.3 | nc    | 2     | 0   |
| 9237   | 2.4     | 2.6   | 3.5c1.3 | nc    | 2     | 0   |



| Strain | EMB     | VB    | MCK     | TCBS  | TSI   |     |
|--------|---------|-------|---------|-------|-------|-----|
|        | Color   | Color | Color   | Color | Color | Gas |
| 9238   | 2.4     | 2.6   | 3.5c1.3 | nc    | 2     | 0   |
| 9239   | 2.4     | 2.6   | 3.5c1.3 | nc    | 2     | 0   |
| 9240   | 2.4     | 2.6   | 3.5c1.3 | nc    | 2     | 0   |
| 9241   | 1.1     | nc    | 1.3     | nc    | 1/2   | 0   |
| 9242   | 1.1     | 2.6   | 1.3     | nc    | 1     | 0   |
| 9243   | 1.1     | 2.6   | 1.3     | nc    | 1/2   | 0   |
| 9244   | 1.1     | 2.6   | 1.3     | nc    | 1     | 0   |
| 9245   | 1.1     | 2.6   | 1.3     | nc    | 1     | 0   |
| 9246   | 1.1     | 2.6   | 1.3     | nc    | 1     | 0   |
| 9247   | 1.1     | nc    | 1.2     | nc    | 1     | 0   |
| 9248   | 1.1     | nc    | 2.1     | nc    | 2/1   | 0   |
| 9249   | 1.1     | nc    | 2.1     | nc    | 2/1   | 0   |
| 9250   | 1.1     | nc    | 1.2     | nc    | 1     | 0   |
| 9251   | 1.1     | nc    | 2.1     | nc    | 1     | 0   |
| 9252   | 1.1     | nc    | 2.1     | nc    | 1/2   | 0   |
| 9253   | 1.1     | nc    | 2.1     | nc    | 2/1   | 0   |
| 9254   | 1.1     | nc    | 2.1     | nc    | 2/1   | 0   |
| 9255   | 1.1     | nc    | 2.1     | nc    | 2/1   | 0   |
| 9256   | 1.1     | nc    | 2.1     | nc    | 1/2   | 0   |
| 9257   | 2.5c1.1 | nc    | 1.2     | nc    | 1/2   | 0   |
| 9258   | 2.5c1.1 | nc    | 1.2     | nc    | 1     | 0   |
| 9259   | 2.5c1.1 | nc    | 1.2     | nc    | 1/2   | 0   |
| 9260   | 2.5c1.1 | nc    | 1.2     | nc    | 1     | 1   |
| 9261   | 2.5c1.1 | nc    | 1.2     | nc    | 1/2   | 0   |
| 9262   | 2.2     | nc    | 1.2     | nc    | 2/1   | 0   |
| 9263   | 2.2     | nc    | 1.5     | nc    | 1     | 0   |
| 9264   | 2.2     | nc    | 2.5     | nc    | 2/1   | 0   |
| 9265   | 2.2     | nc    | 2.5     | nc    | 1/2   | 0   |
| 9266   | 2.2     | nc    | 2.5     | nc    | 1     | 0   |
| 9267   | 2.2     | nc    | 2.5     | nc    | 1/2   | 0   |
| 9268   | 2.5c1.1 | nc    | 2.5     | nc    | 1     | 0   |
| 9269   | 2.5c1.1 | nc    | 2.5     | nc    | 1/2   | 0   |
| 9270   | 2.5c1.1 | nc    | 2.5     | nc    | 1/2   | 0   |
| 9271   | Conta.  | nc    | 2.5     | nc    | 1/2   | 0   |

| Strain | EMB     | VB    | MCK   | TCBS  | TSI   |     |
|--------|---------|-------|-------|-------|-------|-----|
|        | Color   | Color | Color | Color | Color | Gas |
| 9272   | 2.5c1.1 | nc    | 1.2   | nc    | 1     | 1   |
| 9273   | 2.5c1.1 | nc    | 2.1   | nc    | 1/2   | 0   |
| 9274   | 1.1     | nc    | 2.1   | nc    | 1     | 0   |
| 9275   | 2.5c1.1 | nc    | 2.1   | nc    | 1     | 0   |
| 9276   | 2.5c1.1 | nc    | 2.1   | nc    | 1/2   | 0   |
| 9277   | 2.2     | nc    | 2.1   | nc    | 1/2   | 0   |
| 9278   | 2.5c1.1 | nc    | 2.1   | nc    | 1     | 0   |
| 9279   | 2.5c1.1 | nc    | 2.1   | nc    | 1     | 0   |
| 9280   | 2.5c1.1 | nc    | 2.1   | nc    | 1/2   | 0   |
| 9281   | 2.5c1.1 | nc    | 2.1   | nc    | 1     | 0   |
| 9282   | 1.1     | 5.7   | 1.2   | nc    | 1     | 0   |
| 9283   | 2.5c1.1 | nc    | 2.1   | nc    | 1     | 1   |
| 9284   | 1.1     | nc    | 2.1   | nc    | 1/2   | 0   |
| 9285   | 1.1     | nc    | 2.1   | nc    | 1     | 0   |
| 9286   | 1.1     | nc    | 2.1   | nc    | 1/2   | 0   |
| 9287   | 2.5c1.1 | nc    | 2.1   | nc    | 1/2   | 0   |
| 9288   | 1.3     | nc    | 1.2   | nc    | 1     | 0   |
| 9289   | 1.3     | nc    | 1.2   | nc    | 1     | 0   |
| 9290   | 1.3     | nc    | 1.2   | nc    | 1/2   | 0   |
| 9291   | 1.3     | nc    | 1.2   | nc    | 1     | 0   |
| 9292   | 1.3c1.1 | nc    | 1.2   | nc    | 1     | 0   |
| 9293   | 1.3     | nc    | 1.5   | nc    | 1/2   | 1   |
| 9294   | 1.3     | nc    | 1.2   | nc    | 1     | 0   |
| 9295   | 1.3c1.1 | nc    | 1.5   | nc    | 1     | 0   |
| 9296   | 1.3     | nc    | 1.2   | nc    | 1     | 1   |
| 9297   | 1.3     | nc    | 1.2   | nc    | 1     | 0   |
| 9298   | 1.3     | nc    | 1.2   | nc    | 1/2   | 0   |
| 9299   | 1.3     | nc    | 1.2   | nc    | 1/2   | 0   |
| 9300   | 1.3     | nc    | 1.2   | nc    | 1     | 0   |
| 9301   | 1.3     | nc    | 1.2   | nc    | 1/2   | 0   |
| 9302   | 1.3     | nc    | 1.2   | nc    | 1     | 1   |
| 9303   | 1.3     | nc    | 2.1   | nc    | 1     | 0   |
| 9304   | 2.5     | nc    | 2.5   | nc    | 2     | 0   |
| 9305   | 2.2     | 5.8   | 2.5   | nc    | 1/2   | 0   |

| Strain | EMB     | VB    | MCK   | TCBS  | TSI   |     |
|--------|---------|-------|-------|-------|-------|-----|
|        | Color   | Color | Color | Color | Color | Gas |
| 9306   | 2.3     | nc    | 2.5   | nc    | 1     | 0   |
| 9307   | 2.3     | 2.6   | 1.2   | nc    | 1     | 0   |
| 9308   | x       | 2.6   | 2.5   | nc    | 1/2   | 0   |
| 9309   | 2.2     | 2.6   | 2.5   | nc    | 1     | 0   |
| 9310   | 1.3     | nc    | 2.1   | nc    | 1     | 0   |
| 9311   | Conta.  | 2.6   | 2.5   | nc    | 1     | 1   |
| 9312   | 2.2     | 2.6   | 2.5   | nc    | 1/2   | 0   |
| 9313   | x       | 2.6   | 2.5   | nc    | 1     | 0   |
| 9314   | x       | 2.6   | 2.5   | nc    | 2/1   | 0   |
| 9315   | x       | 2.6   | 2.5   | nc    | 1/2   | 0   |
| 9316   | x       | 2.6   | 2.5   | nc    | 2/1   | 0   |
| 9317   | 2.2     | 3.6   | 2.5   | nc    | 1     | 0   |
| 9318   | 6.2c2.2 | 2.6   | 2.5   | nc    | 1     | 0   |
| 9319   | 6.2c2.2 | 2.6   | 2.5   | nc    | 1     | 0   |
| 9320   | 2.2     | nc    | 2.1   | nc    | 1     | 0   |
| 9321   | 1.1     | nc    | 2.1   | nc    | 1     | 0   |
| 9322   | 1.1     | nc    | 2.1   | nc    | 1     | 0   |
| 9323   | 1.1     | nc    | 2.1   | nc    | 1     | 0   |
| 9324   | 1.1     | nc    | 2.1   | nc    | 1     | 0   |
| 9325   | 1.1     | nc    | 2.1   | nc    | 1     | 0   |
| 9326   | 1.1     | nc    | 2.1   | nc    | 1     | 0   |
| 9327   | 1.1     | nc    | 2.1   | nc    | 1     | 0   |
| 9328   | 1.1     | 5.7p  | 2.1   | nc    | 1/2   | 0   |
| 9329   | 1.1     | nc    | 2.1   | nc    | 2     | 0   |
| 9330   | nc      | nc    | 2.3   | nc    | 1/2   | 0   |
| 9331   | 1.1     | nc    | 2.1   | nc    | 1     | 0   |
| 9332   | 1.1     | nc    | 2.1   | nc    | 1     | 0   |
| 9333   | 1.1     | nc    | 2.1   | nc    | 1     | 0   |
| 9334   | 1.1     | 5.7p  | 2.1   | nc    | 1     | 0   |
| 9335   | 1.1     | nc    | 2.1   | nc    | 1     | 0   |
| 9336   | 1.4c1.1 | nc    | 2.3   | nc    | 1     | 0   |
| 9337   | 1.4c1.1 | nc    | 2.3   | nc    | 1/2   | 0   |
| 9338   | 1.4c1.1 | nc    | 2.3   | nc    | 1/2   | 0   |
| 9339   | 1.4c1.1 | nc    | 2.3   | nc    | 1/2   | 0   |

| Strain | EMB      | VB    | MCK   | TCBS  | TSI   |     |
|--------|----------|-------|-------|-------|-------|-----|
|        | Color    | Color | Color | Color | Color | Gas |
| 9340   | 1.4c1.1  | nc    | 2.3   | nc    | 1     | 0   |
| 9341   | 1.4c1.1  | nc    | 2.3   | nc    | 1/2   | 0   |
| 9342   | 1.4c1.1  | nc    | 2.3   | nc    | 1/2   | 0   |
| 9343   | 1.4c1.1  | 1.3   | 2.1   | nc    | 1/2   | 0   |
| 9344   | 1.4c1.1  | 1.3   | 2.1   | nc    | 1     | 0   |
| 9345   | 1.4c1.1  | 1.3   | 2.1   | nc    | 1/2   | 0   |
| 9346   | 1.4c1.1  | 1.3   | 2.1   | nc    | 1/2   | 0   |
| 9347   | 1.4c1.1  | 1.3   | 2.1   | nc    | 1/2   | 0   |
| 9348   | 1.4c1.1  | 1.3   | 2.1   | nc    | 1     | 0   |
| 9349   | 1.4c1.1  | 1.3   | 2.1   | nc    | 1     | 0   |
| 9350   | 1.4c1.1  | 1.3   | 2.1   | nc    | 1     | 0   |
| 9351   | 1.4c1.1  | 1.3   | 2.1   | nc    | 1/2   | 0   |
| 9352   | 2.1      | nc    | 1.5   | nc    | 1/2   | 0   |
| 9353   | 2.4      | nc    | 2.5   | nc    | 1     | 0   |
| 9354   | 2.4      | nc    | 2.5   | nc    | 1     | 0   |
| 9355   | 75-30-20 | 3.6   | 2.1   | nc    | 2     | 0   |
| 9356   | 75-30-20 | 3.6   | 2.1   | nc    | 2     | 0   |
| 9357   | 75-30-20 | 3.6   | 2.1   | nc    | 2     | 0   |
| 9358   | 75-30-20 | 3.6   | 2.1   | nc    | 2     | 0   |
| 9359   | 2.3      | 3.6   | 2.1   | nc    | 2     | 0   |
| 9360   | 75-30-20 | 3.6   | 1.2   | nc    | 2     | 0   |
| 9361   | 75-30-20 | 3.6   | 1.2   | nc    | 2     | 0   |
| 9362   | 75-30-20 | 3.6   | 1.2   | nc    | 2     | 0   |
| 9363   | 2.3      | 3.6   | 1.2   | nc    | 2     | 0   |
| 9364   | 2.3      | 3.6   | 1.2   | nc    | 2     | 0   |
| 9365   | 75-30-20 | 3.6   | 1.2   | nc    | 2     | 0   |
| 9366   | 75-30-20 | 3.6   | 1.2   | nc    | 2     | 0   |
| 9367   | 75-30-20 | 5.7   | 1.2   | nc    | 1     | 0   |
| 9368   | 2.3      | 3.6   | 2.1   | nc    | 1     | 0   |
| 9369   | 75-30-20 | 3.6   | 2.1   | nc    | 1/2   | 0   |
| 9370   | 75-30-20 | 3.6   | 2.1   | nc    | 2     | 0   |
| 9371   | 75-30-20 | 3.6   | 2.1   | nc    | 2     | 0   |
| 9372   | 75-30-20 | 3.6   | 2.1   | nc    | 2     | 0   |
| 9373   | 75-30-20 | 3.6   | 2.1   | nc    | 2     | 1   |

| Strain | EMB      | VB    | MCK   | TCBS  | TSI   |     |
|--------|----------|-------|-------|-------|-------|-----|
|        | Color    | Color | Color | Color | Color | Gas |
| 9374   | 75-30-20 | 3.6   | 2.1   | nc    | 2     | 0   |
| 9375   | 75-30-20 | 3.6   | 2.1   | nc    | 2     | 0   |
| 9376   | 2.3c1.1  | 5.8   | 1.5   | nc    | 2/1   | 0   |
| 9377   | 2.3c1.1  | 5.8   | 1.5   | nc    | 1     | 0   |
| 9378   | 2.3c1.1  | 5.8   | 1.5   | nc    | 1     | 0   |
| 9379   | 2.3c1.1  | 5.8   | 1.5   | nc    | 1     | 0   |
| 9380   | 2.3c1.1  | 5.8   | 1.5   | nc    | 1     | 0   |
| 9381   | 2.3c1.1  | 5.8   | 1.5   | nc    | 1     | 0   |
| 9382   | 2.3c1.1  | 5.8   | 1.5   | nc    | 1     | 0   |
| 9383   | 2.3c1.1  | 5.8   | 1.5   | nc    | 1     | 1   |
| 9384   | 2.3c1.1  | 5.8   | 1.5   | nc    | 1     | 1   |
| 9385   | 2.3c1.1  | 5.8   | 1.5   | nc    | 1     | 0   |
| 9386   | 75-30-20 | 3.6   | 2.1   | nc    | 2     | 0   |
| 9387   | 75-30-20 | 3.6   | 2.1   | nc    | 2     | 0   |
| 9388   | 75-30-20 | 3.6   | 2.1   | nc    | 2     | 0   |
| 9389   | 2.2      | 2.6   | 1.5   | nc    | 2     | 0   |
| 9390   | 2.2      | 2.6   | 1.5   | nc    | 2     | 0   |
| 9391   | 2.2      | 2.6   | 1.5   | nc    | 2     | 0   |
| 9392   | 2.2      | 2.6   | 1.5   | nc    | 2     | 0   |
| 9393   | 2.2      | 2.6   | 1.5   | nc    | 2     | 0   |
| 9394   | 1.1      | 5.5   | 2.3   | nc    | 1     | 0   |
| 9395   | 2.2      | 5.4   | 2.3   | nc    | 1     | 0   |
| 9396   | 1.1      | 5.4   | 2.3   | nc    | 1     | 0   |
| 9397   | 1.1      | 5.4   | 2.3   | nc    | 1     | 0   |
| 9398   | 1.1      | 5.4   | 2.3   | nc    | 1     | 0   |
| 9399   | 1.1      | 5.5   | 2.3   | nc    | 2/1   | 0   |
| 9400   | 1.1      | 5.5   | 2.3   | nc    | 2/1   | 0   |
| 9401   | 1.1      | 5.5   | 2.3   | nc    | 2/1   | 0   |
| 9402   | 1.1      | 5.5   | 2.3   | nc    | 2/1   | 0   |
| 9403   | 1.1      | 5.5   | 2.3   | nc    | 2/1   | 0   |
| 9404   | 1.1      | nc    | 2.3   | nc    | 1     | 0   |
| 9405   | 2.2      | 5.6   | 2.5   | nc    | 2/1   | 0   |
| 9406   | 2.3      | 5.6   | 2.3   | nc    | 2/1   | 0   |
| 9407   | 2.3      | 5.6   | 2.3   | nc    | 2/1   | 0   |

| Strain | EMB     | VB    | MCK   | TCBS  | TSI   |     |
|--------|---------|-------|-------|-------|-------|-----|
|        | Color   | Color | Color | Color | Color | Gas |
| 9408   | 2.2     | 5.6   | 2.3   | nc    | 2/1   | 1   |
| 9409   | 1.1     | 5.6   | 2.1   | nc    | 2/1   | 0   |
| 9410   | 1.1     | 5.6   | 2.1   | nc    | 2     | 0   |
| 9411   | 1.1     | 5.5   | 2.1   | nc    | 2/1   | 0   |
| 9412   | 1.1     | 5.5   | 2.1   | nc    | 2/1   | 0   |
| 9413   | 2.2c1.1 | 5.6   | 2.1   | nc    | 2/1   | 0   |
| 9414   | 1.1     | 5.6   | 2.1   | nc    | 2     | 0   |
| 9415   | 1.1     | 5.6   | 2.1   | nc    | 2     | 0   |
| 9416   | 2.2     | 5.6   | 2.1   | nc    | 2     | 0   |
| 9417   | 2.2c1.1 | 5.6   | 2.1   | nc    | 1     | 0   |
| 9418   | 2.5     | 2.5   | 1.5   | nc    | 2/1   | 0   |
| 9419   | 2.5c2.1 | 2.5   | 2.5   | nc    | 2/1   | 0   |
| 9420   | 2.5c2.1 | 2.5   | 1.1   | nc    | 2/1   | 0   |
| 9421   | 2.3     | 2.6   | 2.3   | nc    | 2/1   | 1   |
| 9422   | 2.5c2.3 | 3.6   | 1.5   | nc    | 2/1   | 0   |
| 9423   | 2.3c2.2 | 5.6   | 1.5   | nc    | 2/1   | 0   |
| 9424   | 2.3c2.2 | 5.6   | 1.5   | nc    | 2/1   | 0   |
| 9425   | 2.3c2.2 | nc    | 1.5   | nc    | 2/1   | 0   |
| 9426   | 2.3c2.2 | 5.6   | 1.5   | nc    | 2/1   | 0   |
| 9427   | 2.3c2.2 | nc    | 1.5   | nc    | 2/1   | 0   |
| 9428   | 2.5c1.1 | nc    | 1.5   | nc    | 1     | 0   |
| 9429   | 2.3c2.2 | 5.6   | 1.5   | nc    | 1     | 1   |
| 9430   | 2.3c2.2 | 5.6   | 1.5   | nc    | 2/1   | 0   |
| 9431   | 2.3c2.2 | 5.6   | 1.5   | nc    | 2/1   | 0   |
| 9432   | 2.3c2.2 | 5.6   | 1.5   | nc    | 2/1   | 0   |
| 9433   | 2.3c2.2 | 5.6   | 1.5   | nc    | 2/1   | 0   |
| 9434   | 2.3c2.2 | 5.6   | 1.5   | nc    | 2/1   | 0   |
| 9435   | 2.3c2.2 | 5.6   | 1.5   | nc    | 2/1   | 0   |
| 9436   | 2.3c2.2 | nc    | 1.5   | nc    | 2/1   | 0   |
| 9437   | 2.3c2.2 | nc    | 1.5   | nc    | 2/1   | 0   |
| 9438   | 2.3c1.1 | 5.7   | 2.3   | nc    | 1     | 0   |
| 9439   | 2.3c1.1 | 5.7   | 2.3   | nc    | 2/1   | 0   |
| 9440   | 2.3c1.1 | 5.7   | 2.3   | nc    | 1     | 1   |
| 9441   | 2.3c1.1 | 5.7   | 2.3   | nc    | 2/1   | 0   |

| Strain | EMB     | VB      | MCK   | TCBS  | TSI   |     |
|--------|---------|---------|-------|-------|-------|-----|
|        | Color   | Color   | Color | Color | Color | Gas |
| 9442   | 1.1     | 5.7     | 2.3   | nc    | 2/1   | 0   |
| 9443   | 2.3c1.1 | 5.7     | 2.3   | nc    | 1     | 0   |
| 9444   | 1.1     | nc      | 1.5   | nc    | 2/1   | 0   |
| 9445   | 1.1     | 5.7     | 1.5   | nc    | 2/1   | 0   |
| 9446   | 1.1     | 5.7     | 1.5   | nc    | 1     | 0   |
| 9447   | 1.1     | 5.7     | 1.5   | nc    | 1     | 0   |
| 9448   | 1.1     | 5.7     | 1.5   | nc    | 2/1   | 0   |
| 9449   | 1.1     | 5.7     | 1.5   | nc    | 2/1   | 0   |
| 9450   | 1.1     | 5.7     | 1.5   | nc    | 1     | 0   |
| 9451   | 1.1     | 5.7     | 1.5   | nc    | 2/1   | 0   |
| 9452   | 1.1     | 5.7     | 1.5   | nc    | 2/1   | 0   |
| 9453   | 1.1     | 5.7     | 1.5   | nc    | 1     | 0   |
| 9454   | 1.1     | 5.7     | 1.5   | nc    | 2/1   | 0   |
| 9455   | 1.1     | 5.7     | 1.5   | nc    | 2/1   | 0   |
| 9456   | 1.1     | 5.7     | 1.5   | nc    | 2/1   | 0   |
| 9457   | 1.1     | 5.7     | 1.5   | nc    | 2/1   | 1   |
| 9458   | 1.1     | 5.7     | 1.5   | nc    | 2/1   | 0   |
| 9459   | 2.2c1.1 | 5.7     | 1.5   | nc    | 2/1   | 0   |
| 9460   | 2.2c3.5 | 4.6     | 1.3   | nc    | 2/1   | 0   |
| 9461   | 2.2c1.1 | nc      | 1.3   | nc    | 1     | 0   |
| 9462   | 2.2c3.5 | 3.6     | 1.3   | nc    | 1     | 0   |
| 9463   | 2.2c3.5 | 5.8     | 1.3   | nc    | 1     | 0   |
| 9464   | 2.5c2.3 | 5.8     | 2.3   | nc    | 2     | 0   |
| 9465   | 2.5c2.3 | 4.6c3.6 | 2.3   | nc    | 2     | 0   |
| 9466   | 2.5c2.3 | 4.6c3.6 | 1.3   | nc    | 2     | 0   |
| 9467   | 2.5c2.3 | 4.6c3.6 | 1.3   | nc    | 2/1   | 0   |
| 9468   | 2.2     | 5.8     | 2.1   | nc    | 2/1   | 0   |
| 9469   | 2.4     | 6.7     | 1.2   | nc    | 1     | 0   |
| 9470   | 2.4     | 6.7     | 1.2   | nc    | 1     | 0   |
| 9471   | 2.2     | nc      | 1.2   | nc    | 1     | 0   |
| 9472   | 2.4     | 6.7     | 1.2   | nc    | 1     | 0   |
| 9473   | 2.4     | 6.7     | 1.2   | nc    | 1     | 0   |
| 9474   | 2.3     | 5.6     | 1.2   | nc    | 1     | 0   |
| 9475   | 2.3     | 5.6     | 1.2   | nc    | 1     | 0   |

| Strain | EMB     | VB    | MCK   | TCBS  | TSI   |     |
|--------|---------|-------|-------|-------|-------|-----|
|        | Color   | Color | Color | Color | Color | Gas |
| 9476   | 2.4     | nc    | 1.2   | nc    | 1     | 0   |
| 9477   | 2.4     | nc    | 1.2   | nc    | 2     | 0   |
| 9478   | nc      | nc    | nc    | nc    | nc    | nc  |
| 9479   | 2.3     | 5.7   | 1.2   | nc    | 2     | 0   |
| 9480   | 2.3     | 5.7   | 1.2   | nc    | 1     | 0   |
| 9481   | 2.3     | nc    | 1.2   | nc    | 1     | 0   |
| 9482   | 2.2     | 6.7   | 1.2   | nc    | 1     | 0   |
| 9483   | 2.1     | nc    | 1.5   | nc    | 1     | 0   |
| 9484   | 2.1     | nc    | 1.5   | nc    | 1     | 0   |
| 9485   | 2.1     | nc    | 1.5   | nc    | 1     | 0   |
| 9486   | 1.1     | nc    | 1.2   | nc    | 1     | 0   |
| 9487   | nc      | nc    | 1.2   | nc    | 1     | 1   |
| 9488   | 1.1     | nc    | 2.5   | nc    | 1     | 0   |
| 9489   | 1.1     | nc    | 1.2   | nc    | 1     | 0   |
| 9490   | 1.1     | nc    | 2.5   | nc    | 1     | 0   |
| 9491   | 1.1     | nc    | 2.5   | nc    | 1     | 0   |
| 9492   | 1.1     | nc    | 2.5   | nc    | 1     | 0   |
| 9493   | 1.3c2.3 | 5.7   | 2.5   | nc    | 2/1   | 0   |
| 9494   | 1.2     | 5.7   | 1.2   | nc    | 1     | 0   |
| 9495   | 1.3     | 5.7   | 1.5   | nc    | 1     | 0   |
| 9496   | 1.1     | 5.7   | 1.2   | nc    | 1     | 0   |
| 9497   | 1.1     | 5.7   | 1.2   | nc    | 1     | 0   |
| 9498   | 1.1     | 5.7   | 1.2   | nc    | 2/1   | 0   |
| 9499   | 1.3c2.3 | 5.7   | 1.2   | nc    | 1     | 1   |
| 9500   | 1.1     | nc    | 1.2   | nc    | 1     | 0   |
| 9501   | 2.3     | nc    | 1.2   | nc    | 1     | 1   |
| 9502   | 1.2     | nc    | 2.5   | nc    | 1     | 1   |
| 9503   | 1.2     | nc    | 2.5   | nc    | 1     | 0   |
| 9504   | 1.2     | nc    | 2.5   | nc    | 1     | 0   |
| 9505   | 1.1     | 5.7   | 1.5   | nc    | 1     | 0   |
| 9506   | 1.1     | 5.7   | 1.5   | nc    | 2/1   | 0   |
| 9507   | 1.1     | 5.7   | 1.5   | nc    | 1     | 0   |
| 9508   | 1.1     | 5.7   | 1.5   | nc    | 1     | 0   |
| 9509   | 1.1     | nc    | 2.5   | nc    | 1     | 1   |



| Strain | EMB     | VB    | MCK   | TCBS  | TSI   |     |
|--------|---------|-------|-------|-------|-------|-----|
|        | Color   | Color | Color | Color | Color | Gas |
| 9510   | 2.3     | nc    | 2.5   | nc    | 1     | 0   |
| 9511   | 2.3     | nc    | 2.5   | nc    | 1     | 1   |
| 9512   | 2.3     | nc    | 2.5   | nc    | 1     | 0   |
| 9513   | 1.1     | nc    | 2.5   | nc    | 1     | 0   |
| 9514   | 2.2     | 5.7   | 2.5   | nc    | 2/1   | 0   |
| 9515   | 1.1     | nc    | 2.5   | nc    | 2/1   | 0   |
| 9516   | 1.1     | nc    | 2.5   | nc    | 1     | 0   |
| 9517   | 1.1     | nc    | 2.5   | nc    | 1     | 1   |
| 9518   | 1.1     | nc    | 2.5   | nc    | 1     | 0   |
| 9519   | 1.1     | 5.7   | 2.5   | nc    | 2/1   | 0   |
| 9520   | nc      | nc    | nc    | nc    | nc    | nc  |
| 9521   | 1.3     | 5.8   | 1.5   | nc    | 1     | 0   |
| 9522   | 1.1     | nc    | 2.5   | nc    | 3     | 0   |
| 9523   | 1.1     | nc    | 1.2   | nc    | 1     | 1   |
| 9524   | 1.1     | nc    | 1.2   | nc    | 1     | 0   |
| 9525   | 1.1     | nc    | 1.2   | nc    | 1     | 0   |
| 9526   | 1.1     | nc    | 1.2   | nc    | 1     | 0   |
| 9527   | 2.3     | nc    | 1.2   | nc    | 1     | 1   |
| 9528   | 1.1     | nc    | 1.2   | nc    | 2/1   | 0   |
| 9529   | 2.4     | nc    | 1.2   | nc    | 1     | 0   |
| 9530   | 6.2c2.2 | 2.6   | 1.2   | nc    | 2/1   | 0   |
| 9531   | 2.3     | nc    | 2.1   | nc    | 1     | 0   |
| 9532   | 2.3     | 2.6   | 2.1   | nc    | 2/1   | 0   |
| 9533   | 6.2c2.2 | 2.6   | 2.5   | nc    | 2     | 0   |
| 9534   | 6.2c2.2 | 2.6   | 2.5   | nc    | 2     | 0   |
| 9535   | nc      | nc    | nc    | nc    | nc    | nc  |
| 9536   | 2.3c1.1 | nc    | 2.5   | nc    | 2/1   | 0   |
| 9537   | 2.1     | nc    | 2.5   | nc    | 1     | 0   |
| 9538   | 2.1     | nc    | 2.5   | nc    | 1     | 0   |
| 9539   | 2.1     | nc    | 2.5   | nc    | 1     | 0   |
| 9540   | 2.1     | nc    | 2.5   | nc    | 1     | 0   |
| 9541   | 2.1     | nc    | 2.5   | nc    | 1     | 0   |
| 9542   | 1.2     | nc    | 2.5   | nc    | 2/3   | 0   |
| 9543   | 1.1     | nc    | 2.5   | nc    | 1     | 0   |

| Strain | EMB   | VB    | MCK   | TCBS  | TSI   |     |
|--------|-------|-------|-------|-------|-------|-----|
|        | Color | Color | Color | Color | Color | Gas |
| 9544   | 1.1   | nc    | 2.5   | nc    | 1     | 0   |
| 9545   | 1.1   | nc    | 2.5   | nc    | 1     | 1   |
| 9546   | 1.3   | nc    | 2.5   | nc    | 2/3   | 0   |
| 9547   | 1.1   | nc    | 1.2   | nc    | 1     | 1   |
| 9548   | 1.1   | nc    | 2.5   | nc    | 1/3   | 0   |
| 9549   | 1.3   | nc    | 2.5   | nc    | 2/3   | 0   |
| 9550   | 1.3   | nc    | 1.2   | nc    | 1     | 0   |
| 9551   | 1.1   | nc    | 1.2   | nc    | 1     | 0   |
| 9552   | 1.1   | nc    | 1.2   | nc    | 1     | 0   |
| 9553   | 1.1   | nc    | 1.2   | nc    | 1/3   | 0   |
| 9554   | 1.1   | nc    | 1.2   | nc    | 1     | 0   |
| 9555   | 1.1   | nc    | 1.2   | nc    | 1     | 0   |
| 9556   | 1.1   | nc    | 1.2   | nc    | 1/3   | 0   |
| 9557   | 2.2   | nc    | 1.2   | nc    | 1     | 0   |
| 9558   | 2.3   | 2.6   | 1.2   | nc    | 2     | 0   |
| 9559   | 2.3   | 2.6   | 1.2   | nc    | 2     | 0   |
| 9560   | 2.3   | 2.6   | 1.2   | nc    | 2     | 0   |
| 9561   | 2.3   | 2.6   | 1.2   | nc    | 2     | 0   |
| 9562   | 2.3   | 2.6   | 1.2   | nc    | 2     | 0   |
| 9563   | 2.3   | 2.6   | 1.2   | nc    | 2     | 0   |
| 9564   | 2.3   | 2.6   | 1.2   | nc    | 2     | 0   |
| 9565   | 2.3   | 2.6   | 1.2   | nc    | 2     | 0   |
| 9566   | 2.3   | 2.6   | 1.2   | nc    | 2     | 0   |
| 9567   | 2.3   | 2.6   | 1.2   | nc    | 2     | 0   |
| 9568   | 2.3   | 2.6   | 1.2   | nc    | 2     | 0   |
| 9569   | 2.2   | 2.5   | 2.3   | nc    | 2     | 0   |
| 9570   | 2.2   | 2.5   | 2.3   | nc    | 2     | 0   |
| 9571   | 2.2   | 2.5   | 2.3   | nc    | 2     | 0   |
| 9572   | 2.2   | 2.5   | 2.3   | nc    | 2     | 0   |
| 9573   | 2.2   | 2.5   | 2.3   | nc    | 2     | 0   |
| 9574   | 2.1   | 6.7   | 1.2   | nc    | 1     | 1   |
| 9575   | 2.2   | 2.5   | 1.2   | nc    | 1     | 1   |
| 9576   | 1.1   | 6.7   | 1.2   | nc    | 1     | 1   |
| 9577   | 1.1   | 6.7   | 1.2   | nc    | 1     | 1   |

| Strain | EMB     | VB    | MCK   | TCBS  | TSI   |     |
|--------|---------|-------|-------|-------|-------|-----|
|        | Color   | Color | Color | Color | Color | Gas |
| 9578   | 1.1     | 6.7   | 1.2   | nc    | 1     | 1   |
| 9579   | 1.1     | 6.7   | 1.2   | nc    | 1     | 1   |
| 9580   | 1.1     | 6.7   | 1.2   | nc    | 1     | 1   |
| 9581   | 1.1     | 6.7   | 1.2   | nc    | 1     | 1   |
| 9582   | 1.1     | 6.7   | 1.2   | nc    | 1     | 1   |
| 9583   | nc      | nc    | nc    | nc    | nc    | nc  |
| 9584   | 1.1     | 6.7   | 1.2   | nc    | 1     | 1   |
| 9585   | 2.2c2.1 | 5.8   | 1.5   | nc    | 2/1   | 1   |
| 9586   | 2.1     | 6.7   | 1.2   | nc    | 1     | 1   |
| 9587   | 2.1     | 6.7   | 1.2   | nc    | 1     | 1   |
| 9588   | 2.1     | 6.7   | 1.2   | nc    | 1     | 1   |
| 9589   | 2.1     | 6.7   | 1.2   | nc    | 1     | 1   |
| 9590   | 2.3c1.1 | 5.8   | 1.5   | nc    | 1     | 1   |
| 9591   | 2.3c1.1 | 5.8   | 1.5   | nc    | 2/1   | 1   |
| 9592   | 2.3c1.1 | 5.8   | 1.5   | nc    | 2/1   | 1   |
| 9593   | 2.3c1.1 | 5.8   | 1.5   | nc    | 2/1   | 1   |
| 9594   | 2.3c1.1 | 5.8   | 1.5   | nc    | 2/1   | 1   |
| 9595   | 2.3c1.1 | 5.8   | 1.5   | nc    | 2/1   | 1   |
| 9596   | 2.3c1.1 | 5.8   | 1.5   | nc    | 2/1   | 1   |
| 9597   | 2.3c1.1 | 5.8   | 1.5   | nc    | 2/1   | 0   |
| 9598   | 2.3c1.1 | 5.8   | 1.5   | nc    | 2/1   | 1   |
| 9599   | 1.1     | 5.8   | 1.1   | nc    | 1     | 1   |
| 9600   | 2.2     | 2.5   | 1.2   | nc    | 2/1   | 1   |
| 9601   | 1.1     | nc    | nc    | nc    | 2/1   | 0   |
| 9602   | 2.3c1.1 | 5.8   | z     | nc    | 1     | 0   |
| 9603   | 1.1     | nc    | 1.1   | nc    | 1     | 0   |
| 9604   | 2.3c1.1 | 5.8   | 1.5   | nc    | 1     | 0   |
| 9605   | 2.3c1.1 | 5.8   | 1.5   | nc    | 1     | 0   |
| 9606   | 2.3c1.1 | 5.8   | 1.5   | nc    | 1     | 1   |
| 9607   | 1.3     | 5.8   | 1.5   | nc    | 2/1   | 0   |
| 9608   | 2.3c1.1 | 5.8   | 1.5   | nc    | 1     | 1   |
| 9609   | 2.4     | 2.6   | 2.3   | nc    | nc    | nc  |
| 9610   | 2.3c1.1 | 5.8   | 1.5   | nc    | 1     | 1   |
| 9611   | 2.3c1.1 | 5.8   | 1.5   | nc    | 1     | 0   |

| Strain | EMB     | VB    | MCK     | TCBS  | TSI   |     |
|--------|---------|-------|---------|-------|-------|-----|
|        | Color   | Color | Color   | Color | Color | Gas |
| 9612   | 1.3c1.1 | 5.8   | 1.5c1.1 | nc    | 1     | 0   |
| 9613   | 2.1     | nc    | nc      | nc    | nc    | nc  |
| 9614   | 2.3c1.1 | 5.8   | 1.5     | nc    | 1     | 1   |
| 9615   | nc      | nc    | nc      | nc    | 1     | 1   |
| 9616   | 1.3c1.1 | 5.8   | 1.5c1.1 | nc    | 1     | 1   |
| 9617   | nc      | nc    | nc      | nc    | nc    | nc  |
| 9618   | 1.3c1.1 | 5.8   | 1.5c1.1 | nc    | 1     | 1   |
| 9619   | nc      | nc    | nc      | nc    | nc    | nc  |
| 9620   | 1.3c1.1 | 5.8   | 1.5c1.1 | nc    | 1     | 1   |
| 9621   | 2.3c1.1 | 5.8   | 1.5     | nc    | 1     | 0   |
| 9622   | 1.3c1.1 | 5.8   | 1.5c1.1 | nc    | 1     | 1   |
| 9623   | nc      | nc    | nc      | nc    | nc    | nc  |
| 9624   | 1.3c1.1 | 5.8   | 1.5c1.1 | nc    | 1     | 0   |
| 9625   | 2.3c1.1 | 5.8   | 1.5     | nc    | 1     | 0   |
| 9626   | 2.3c1.1 | 5.8   | 1.5     | nc    | 2/1   | 1   |
| 9627   | nc      | nc    | nc      | nc    | nc    | nc  |
| 9628   | 2.3c1.1 | 5.8   | 1.5     | nc    | 1     | 0   |
| 9629   | nc      | nc    | nc      | nc    | nc    | nc  |
| 9630   | 2.3c1.1 | 5.8   | 1.5     | nc    | 1     | 0   |
| 9631   | 2.3c1.1 | 5.8   | 1.5     | nc    | 1     | 0   |
| 9632   | 2.3c1.1 | 5.8   | 1.5     | nc    | 1     | 1   |
| 9633   | 2.3c1.1 | 5.8   | 1.5     | nc    | 1     | 0   |
| 9634   | 2.3c1.1 | 5.8   | 1.5     | nc    | 1     | 0   |
| 9635   | nc      | nc    | nc      | nc    | 2/1   | 1   |
| 9636   | 2.1     | nc    | 1.1     | nc    | 1     | 0   |
| 9637   | nc      | nc    | nc      | nc    | 1     | 0   |
| 9638   | nc      | nc    | nc      | nc    | 1     | 0   |
| 9639   | 2.3c1.1 | 5.8   | 1.5     | nc    | 1     | 0   |
| 9640   | 2.3c1.1 | 5.8   | 1.1     | nc    | 1     | 0   |
| 9641   |         |       |         |       |       |     |
| 9642   |         |       |         |       |       |     |
| 9643   |         |       |         |       |       |     |
| 9644   |         |       |         |       |       |     |
| 9645   |         |       |         |       |       |     |

| Strain | EMB   | VB    | MCK   | TCBS  | TSI   |     |
|--------|-------|-------|-------|-------|-------|-----|
|        | Color | Color | Color | Color | Color | Gas |
| 9646   |       |       |       |       |       |     |
| 9647   |       |       |       |       |       |     |
| 9648   |       |       |       |       |       |     |
| 9649   | nc    | nc    | nc    | nc    | nc    | nc  |
| 9650   | nc    | nc    | nc    | nc    | nc    | nc  |
| 9651   | nc    | nc    | nc    | nc    | nc    | nc  |
| 9652   | nc    | nc    | nc    | nc    | nc    | nc  |
| 9653   | nc    | nc    | nc    | nc    | nc    | nc  |
| 9654   | 2.3   | 6.7   | 1.1   | nc    | 1     | 0   |
| 9655   | 2.3   | 5.8   | 2.5   | nc    | 2     | 0   |
| 9656   | 2.3   | 5.8   | 2.5   | nc    | 2     | 0   |
| 9657   | 2.3   | nc    | 2.5   | nc    | 2     | 0   |
| 9658   | 2.3   | nc    | 2.5   | nc    | 2     | 0   |
| 9659   | 2.3   | 5.8   | 2.5   | nc    | 2     | 0   |
| 9660   | 2.3   | nc    | 2.5   | nc    | 2     | 0   |
| 9661   | 2.3   | nc    | 2.5   | nc    | 2     | 0   |
| 9662   | 2.3   | 2.6   | 1.5   | nc    | 2     | 0   |
| 9663   | 2.3   | 2.6   | 1.5   | nc    | 2     | 0   |
| 9664   | 2.3   | 2.6   | 1.5   | nc    | 2     | 0   |
| 9665   | 2.3   | 2.6   | 1.5   | nc    | 2     | 0   |
| 9666   | 2.3   | 2.6   | 1.5   | nc    | 2     | 0   |
| 9667   | 2.3   | 2.6   | 1.5   | nc    | 2     | 0   |
| 9668   | 2.3   | 2.6   | 1.5   | nc    | 2     | 0   |
| 9669   | 2.3   | 2.6   | 1.5   | nc    | 2     | 0   |
| 9670   | 2.3   | 2.6   | 1.5   | nc    | 2     | 0   |
| 9671   | 2.3   | 2.5   | 2.5   | nc    | 2     | 0   |
| 9672   | 2.3   | 2.5   | 2.5   | nc    | 2     | 0   |
| 9673   | 2.3   | 2.5   | 2.5   | nc    | 2     | 0   |
| 9674   | 2.3   | 2.5   | 2.5   | nc    | 2     | 0   |
| 9675   | 2.3   | 2.5   | 2.5   | nc    | 2     | 0   |
| 9676   | 2.3   | 2.5   | 2.5   | nc    | 2     | 0   |
| 9677   | 2.3   | 2.5   | 2.5   | nc    | 2     | 0   |
| 9678   | 2.3   | 2.5   | 1.5   | nc    | 2     | 0   |
| 9679   | 2.3   | 2.5   | 2.5   | nc    | 2     | 0   |

| Strain | EMB   | VB    | MCK   | TCBS  | TSI   |     |
|--------|-------|-------|-------|-------|-------|-----|
|        | Color | Color | Color | Color | Color | Gas |
| 9680   | 2.3   | 2.5   | 2.5   | nc    | 2     | 0   |
| 9681   | 2.3   | 2.5   | 2.5   | nc    | 2     | 0   |
| 9682   | 2.3   | 2.5   | 2.5   | nc    | 2     | 0   |
| 9683   | 2.3   | 2.5   | 2.5   | nc    | 2     | 0   |
| 9684   | 2.3   | 2.5   | 2.5   | nc    | 2     | 0   |
| 9685   | 2.3   | 2.5   | 2.5   | nc    | 2     | 0   |
| 9686   | 2.3   | 2.5   | 2.5   | nc    | 2     | 0   |
| 9687   | 2.3   | 2.5   | 2.5   | nc    | 2     | 0   |
| 9688   | 2.3   | 2.5   | 2.5   | nc    | 2     | 0   |
| 9689   | 2.3   | 2.5   | 2.5   | nc    | 2     | 0   |
| 9690   | 2.3   | 2.5   | 2.5   | nc    | 2     | 0   |
| 9691   | 2.3   | 2.5   | 2.5   | nc    | 2     | 0   |
| 9692   | x     | 1.3   | 2.1   | nc    | 2     | 0   |
| 9693   | x     | 1.3   | 2.1   | nc    | 2     | 0   |
| 9694   | 1.3   | 2.3   | 2.3   | nc    | 2     | 0   |
| 9695   | 1.3   | 2.3   | 2.3   | nc    | 2     | 0   |
| 9696   | 1.3   | 2.3   | 2.3   | nc    | 2     | 0   |
| 9697   | 1.3   | 2.3   | 2.3   | nc    | 2     | 0   |
| 9698   | 1.3   | 2.3   | 2.3   | nc    | 2     | 0   |
| 9699   | 1.3   | 2.3   | 2.3   | nc    | 2     | 0   |
| 9700   | 1.3   | 2.3   | 2.3   | nc    | 2     | 0   |
| 9701   | 1.3   | 2.3   | 2.3   | nc    | 2     | 0   |
| 9702   | 1.3   | 2.3   | 2.3   | nc    | 2     | 0   |
| 9703   | 1.3   | 2.3   | 2.3   | nc    | 2     | 0   |
| 9704   | 1.3   | 2.3   | 2.3   | nc    | 2     | 0   |
| 9705   | 1.3   | 2.3   | 2.3   | nc    | 2     | 0   |
| 9706   | 1.3   | 2.3   | 2.3   | nc    | 2     | 0   |
| 9707   | 1.3   | 2.3   | 2.3   | nc    | 2     | 0   |
| 9708   | 1.3   | 2.3   | 2.3   | nc    | 2     | 0   |
| 9709   | 1.3   | 2.3   | 2.3   | nc    | 2     | 0   |
| 9710   | 1.3   | 2.3   | 2.3   | nc    | 2     | 0   |
| 9711   | 1.3   | 2.3   | 2.3   | nc    | 2     | 0   |
| 9712   | 1.3   | 2.3   | 2.3   | nc    | 2     | 0   |
| 9713   | 1.3   | 2.3   | 2.3   | nc    | 2     | 0   |

| Strain | EMB   | VB    | MCK   | TCBS  | TSI   |     |
|--------|-------|-------|-------|-------|-------|-----|
|        | Color | Color | Color | Color | Color | Gas |
| 9714   | 1.3   | 2.3   | 2.3   | nc    | 2     | 0   |
| 9715   | 1.3   | 2.3   | 2.1   | nc    | 2     | 0   |
| 9716   | 2.2   | 2.5   | 2.1   | nc    | 2     | 0   |
| 9717   | 2.2   | 2.5   | 2.1   | nc    | 2     | 0   |
| 9718   | 2.2   | 2.5   | 2.1   | nc    | 2     | 0   |
| 9719   | 2.2   | 2.5   | 2.1   | nc    | 2     | 0   |
| 9720   | 2.2   | 2.5   | 2.1   | nc    | 2     | 0   |
| 9721   | 2.2   | 2.5   | 2.1   | nc    | 2     | 0   |
| 9722   | 2.2   | 2.5   | 2.1   | nc    | 2     | 0   |
| 9723   | 2.2   | 2.5   | 2.1   | nc    | 2     | 0   |
| 9724   | 2.2   | 2.5   | 2.1   | nc    | 2     | 0   |
| 9725   | 2.2   | 2.5   | 2.1   | nc    | 2     | 0   |
| 9726   | 2.2   | 2.5   | 2.1   | nc    | 2     | 0   |
| 9727   | 2.2   | 2.5   | 2.1   | nc    | 2     | 0   |
| 9728   | 2.2   | 2.5   | 2.1   | nc    | 2     | 0   |
| 9729   | 2.2   | 2.5   | 2.1   | nc    | 2     | 0   |
| 9730   | 2.2   | 2.5   | 2.1   | nc    | 2     | 0   |
| 9731   | 2.2   | 2.5   | 2.1   | nc    | 2     | 0   |
| 9732   | 2.2   | 2.5   | 2.1   | nc    | 2     | 0   |
| 9733   | 2.2   | 2.5   | 2.1   | nc    | 2     | 0   |
| 9734   | 2.2   | 2.5   | 2.1   | nc    | 2     | 0   |
| 9735   | 2.2   | 2.5   | 2.1   | nc    | 2     | 0   |
| 9736   | 2.2   | 2.5   | 2.1   | nc    | 2     | 0   |
| 9737   | 1.3   | 3.2   | 1.5   | nc    | 2     | 0   |
| 9738   | 1.3   | 3.2   | 1.5   | nc    | 2     | 0   |
| 9739   | 1.3   | 3.2   | 1.5   | nc    | 2     | 0   |
| 9740   | 1.3   | 3.2   | 1.5   | nc    | 2     | 0   |
| 9741   | 1.3   | 3.2   | 1.5   | nc    | 2     | 0   |
| 9742   | 2.2   | 2.5   | 1.5   | nc    | 2     | 0   |
| 9743   | 2.2   | 2.5   | 1.5   | nc    | 2     | 0   |
| 9744   | 2.2   | 2.5   | 1.5   | nc    | 2     | 0   |
| 9745   | 2.2   | 2.5   | 1.5   | nc    | 2     | 0   |
| 9746   | 2.2   | 2.5   | 1.5   | nc    | 2     | 0   |
| 9747   | 2.2   | 2.5   | 1.5   | nc    | 2     | 0   |

| Strain | EMB     | VB    | MCK   | TCBS  | TSI   |     |
|--------|---------|-------|-------|-------|-------|-----|
|        | Color   | Color | Color | Color | Color | Gas |
| 9748   | 2.2     | 2.5   | 1.5   | nc    | 2     | 0   |
| 9749   | 2.2     | 2.5   | 1.5   | nc    | 2     | 0   |
| 9750   | 2.2     | 2.5   | 1.5   | nc    | 2     | 0   |
| 9751   | 2.2     | 2.5   | 1.5   | nc    | 2     | 0   |
| 9752   | 2.2     | 2.5   | 2.5   | nc    | 2     | 0   |
| 9753   | 2.2     | 2.5   | 2.5   | nc    | 2     | 0   |
| 9754   | 2.2     | 2.5   | 2.5   | nc    | 2     | 0   |
| 9755   | 2.2     | 2.5   | 2.5   | nc    | 2     | 0   |
| 9756   | 4.3c2.2 | 2.5   | 2.5   | nc    | 2     | 0   |
| 9757   | 2.2     | 2.5   | 2.5   | nc    | 2     | 0   |
| 9758   | 2.2     | 2.5   | 2.5   | nc    | 2     | 0   |
| 9759   | 2.2     | 2.5   | 2.5   | nc    | 2     | 0   |
| 9760   | 2.2     | 2.5   | 2.5   | nc    | 2     | 0   |
| 9761   | 2.4     | 4.4   | 1.5   | nc    | 2     | 0   |
| 9762   | 2.4     | 4.4   | 1.5   | nc    | 2     | 0   |
| 9763   | 2.4     | 4.4   | 1.5   | nc    | 2     | 0   |
| 9764   | 2.4     | 3.4   | 1.5   | nc    | 2     | 0   |
| 9765   | 2.4     | 4.4   | 1.5   | nc    | 2     | 0   |
| 9766   | 2.4     | 4.4   | 1.5   | nc    | 2     | 0   |
| 9767   | 2.4     | 4.4   | 1.5   | nc    | 2     | 0   |
| 9768   | 2.4     | 4.4   | 1.5   | nc    | 2     | 0   |
| 9769   | xc2.3   | 2.5   | 1.5   | nc    | 2     | 0   |
| 9770   | xc2.3   | nc    | 2.3   | nc    | 2     | 0   |
| 9771   | xc2.3   | 4.5   | 2.3   | nc    | 2     | 0   |
| 9772   | xc2.3   | 4.5   | 2.3   | nc    | 2     | 0   |
| 9773   | xc2.3   | 4.5   | 2.3   | nc    | 2     | 0   |
| 9774   | xc2.3   | 4.5   | 2.3   | nc    | 2     | 0   |
| 9775   | xc2.3   | 4.5   | 2.3   | nc    | 2     | 0   |
| 9776   | xc2.3   | 4.5   | 2.3   | nc    | 2     | 0   |
| 9777   | 1.3     | 2.6   | 1.3   | nc    | 2     | 0   |
| 9778   | 1.3     | 2.6   | 1.3   | nc    | 2     | 0   |
| 9779   | 1.3     | 2.6   | 1.3   | nc    | 2     | 0   |
| 9780   | 1.3     | 2.6   | 1.3   | nc    | 2     | 0   |
| 9781   | 1.3     | 2.6   | 1.3   | nc    | 2     | 0   |



| Strain | EMB   | VB    | MCK   | TCBS  | TSI   |     |
|--------|-------|-------|-------|-------|-------|-----|
|        | Color | Color | Color | Color | Color | Gas |
| 9782   | 2.3   | 4.5   | 1.3   | nc    | 2     | 0   |
| 9783   | 4.2   | 4.5   | 3.5   | nc    | 2     | 0   |
| 9784   | 4.2   | 4.5   | 3.5   | nc    | 2     | 0   |
| 9785   | 2.3   | 4.5   | 1.3   | nc    | 2     | 0   |
| 9786   | 2.3   | 4.5   | 1.3   | nc    | 2     | 0   |
| 9787   | 2.3   | 4.5   | 1.3   | nc    | 2     | 0   |
| 9788   | 2.3   | 4.5   | 1.3   | nc    | 2     | 0   |
| 9789   | 2.3   | 4.5   | 1.3   | nc    | 2     | 0   |
| 9790   | 2.3   | 4.5   | 1.3   | nc    | 2     | 0   |
| 9791   | 2.3   | 4.5   | 1.3   | nc    | 2     | 0   |
| 9792   | 2.3   | 4.5   | 1.3   | nc    | 2     | 0   |
| 9793   | 2.3   | 4.5   | 1.3   | nc    | 2     | 0   |
| 9794   | 2.3   | 4.5   | 1.3   | nc    | 2     | 0   |
| 9795   | 2.3   | 4.5   | 1.3   | nc    | 2     | 0   |
| 9796   | 2.3   | 4.5   | 1.3   | nc    | 2     | 0   |
| 9797   | 2.3   | 4.5   | 1.3   | nc    | 2     | 0   |
| 9798   | 2.3   | 4.5   | 1.3   | nc    | 2     | 0   |
| 9799   | 2.3   | 4.5   | 1.3   | nc    | 2     | 0   |
| 9800   | 2.3   | 4.5   | 1.3   | nc    | 2     | 0   |
| 9801   | 2.3   | 4.5   | 1.3   | nc    | 2     | 0   |
| 9802   | 2.3   | 4.5   | 1.3   | nc    | 2     | 0   |
| 9803   | 2.3   | 4.5   | 1.3   | nc    | 2     | 0   |
| 9804   | 2.3   | 4.5   | 1.3   | nc    | 2     | 0   |
| 9805   | 2.3   | 4.5   | 1.3   | nc    | 2     | 0   |
| 9806   | 2.3   | 4.5   | 1.3   | nc    | 2     | 0   |
| 9807   | 2.3   | 4.5   | 1.3   | nc    | 2     | 0   |
| 9808   | 2.3   | 4.5   | 1.3   | nc    | 2     | 0   |
| 9809   | 2.3   | 4.5   | 1.3   | nc    | 2     | 0   |
| 9810   | 2.3   | 4.5   | 1.3   | nc    | 2     | 0   |
| 9811   | 2.3   | 4.5   | 1.3   | nc    | 2     | 0   |
| 9812   | 2.3   | 4.5   | 1.3   | nc    | 2     | 0   |
| 9813   | 2.3   | 4.5   | 1.3   | nc    | 2     | 0   |
| 9814   | 2.3   | 4.5   | 1.3   | nc    | 2     | 0   |
| 9815   | 2.3   | 4.5   | 1.3   | nc    | 2     | 0   |

| Strain | EMB   | VB    | MCK   | TCBS  | TSI   |     |
|--------|-------|-------|-------|-------|-------|-----|
|        | Color | Color | Color | Color | Color | Gas |
| 9816   | 2.3   | 4.5   | 1.3   | nc    | 2     | 0   |
| 9817   | 2.3   | 4.5   | 1.3   | nc    | 2     | 0   |
| 9818   | 2.3   | 4.5   | 1.3   | nc    | 2     | 0   |
| 9819   | 2.3   | 4.5   | 1.3   | nc    | 2     | 0   |
| 9820   | 2.2   | nc    | nc    | nc    | nc    | nc  |
| 9821   | 2.3   | 4.5   | 1.3   | nc    | 2     | 0   |
| 9822   | 2.2   | 1.3   | 2.5   | nc    | 2     | 0   |
| 9823   | 2.2   | 1.3   | 2.5   | nc    | 2     | 0   |
| 9824   | 2.2   | 1.3   | 2.5   | nc    | 2     | 0   |
| 9825   | 2.2   | 1.3   | 2.5   | nc    | 2     | 0   |
| 9826   | 2.2   | 1.3   | 2.5   | nc    | 2     | 0   |
| 9827   | 2.2   | 1.3   | 2.5   | nc    | 2     | 0   |
| 9828   | 2.2   | 1.3   | 2.5   | nc    | 2     | 0   |
| 9829   | 2.2   | 1.3   | 2.5   | nc    | 2     | 0   |
| 9830   | 2.2   | 1.3   | 2.5   | nc    | 2     | 0   |
| 9831   | 2.2   | 1.3   | 2.5   | nc    | 2     | 0   |
| 9832   | 2.2   | 1.3   | 2.5   | nc    | 2     | 0   |
| 9833   | 2.2   | 1.3   | 2.5   | nc    | 2     | 0   |
| 9834   | 2.2   | 1.3   | 2.5   | nc    | 2     | 0   |
| 9835   | 2.2   | 1.3   | 2.5   | nc    | 2     | 0   |
| 9836   | 2.2   | 2.3   | nc    | nc    | 2     | 0   |
| 9837   | 2.2   | 1.3   | 2.5   | nc    | 2     | 0   |
| 9838   | 2.2   | 1.3   | 2.5   | nc    | 2     | 0   |
| 9839   | 2.2   | 1.3   | 2.5   | nc    | 2     | 0   |
| 9840   | 2.2   | 1.3   | 2.5   | nc    | 2     | 0   |
| 9841   | 2.2   | 2.3   | 2.5   | nc    | 2     | 0   |
| 9842   | 1.1   | 2.3   | 1.5   | nc    | 2     | 0   |
| 9843   | 1.1   | 2.3   | 1.5   | nc    | 2     | 0   |
| 9844   | 1.1   | 2.3   | 1.5   | nc    | 1     | 0   |
| 9845   | 1.1   | 2.3   | 1.5   | nc    | 2     | 0   |
| 9846   | 1.1   | 2.3   | 1.5   | nc    | 1     | 0   |
| 9847   | 1.1   | 2.3   | 1.5   | nc    | 1     | 0   |
| 9848   | 1.1   | 2.3   | 1.5   | nc    | 2     | 0   |
| 9849   | 1.1   | 2.3   | 1.5   | nc    | 2     | 0   |

| Strain | EMB     | VB    | MCK   | TCBS   | TSI   |     |
|--------|---------|-------|-------|--------|-------|-----|
|        | Color   | Color | Color | Color  | Color | Gas |
| 9850   | 1.1     | 2.3   | 1.5   | nc     | 2     | 0   |
| 9851   | 1.1     | 2.3   | 1.5   | nc     | 1     | 0   |
| 9852   | 2.1     | 2.3   | 1.5   | nc     | 1     | 0   |
| 9853   | 2.1     | 2.3   | 1.5   | nc     | 2     | 0   |
| 9854   | 2.1     | 2.3   | 1.5   | nc     | 2     | 0   |
| 9855   | 2.1     | 2.3   | 1.5   | nc     | 2     | 0   |
| 9856   | 2.1     | 2.3   | 1.5   | nc     | 2     | 0   |
| 9858   | 2.3c1.1 | 5.7   | 1.5   | 9-5-10 | 2/1   | 1   |
| 9859   | 2.3c1.1 | 5.7   | 1.5   | 9-5-10 | 2/1   | 1   |
| 9860   | 2.3c1.1 | 5.7   | 1.5   | 9-5-10 | 1     | 1   |
| 9861   | 2.3c1.1 | 5.7   | 1.5   | 9-5-10 | 2/1   | 0   |
| 9862   | 1.1     | 6.7   | 2.3   | 9-6-9  | 1     | 0   |
| 9863   | 1.1     | 6.7   | 2.5   | 9-6-9  | 1     | 0   |
| 9864   | 1.1     | 6.7   | 2.5   | nc     | 1     | 0   |
| 9865   | 1.1     | 6.7   | 2.5   | nc     | 1     | 0   |
| 9866   | 1.1     | 6.7   | 1.5   | nc     | 1     | 0   |
| 9867   | 1.1     | 6.7   | 1.5   | nc     | 1     | 0   |
| 9868   | 1.1     | 6.7   | 1.5   | nc     | 2/1   | 1   |
| 9869   | 1.1     | 6.7   | 1.5   | nc     | 1     | 1   |
| 9870   | 1.1     | 6.7   | 1.5   | nc     | 1     | 1   |
| 9871   | 1.1     | 6.7   | 1.5   | nc     | 1     | 1   |
| 9872   | 1.1     | 6.7   | 1.5   | nc     | 1     | 1   |
| 9873   | 1.1     | 6.7   | 1.5   | nc     | 1     | 1   |
| 9874   | 2.3c1.1 | 5.7   | 1.5   | 9-5-10 | 2/1   | 0   |
| 9875   | 2.3c1.1 | 5.7   | 1.5   | 9-5-10 | 2/1   | 0   |
| 9876   | 2.3c1.1 | 5.7   | 1.5   | 9-5-10 | 2/1   | 0   |
| 9877   | 2.3c1.1 | 5.7   | 1.5   | nc     | 2/1   | 1   |
| 9878   | 2.3c1.1 | 5.7   | 1.5   | nc     | 2/1   | 1   |
| 9879   | 2.3c1.1 | 5.7   | 1.5   | 9-5-10 | 2/1   | 1   |
| 9880   | 2.3c1.1 | 5.7   | 1.5   | nc     | 2/1   | 1   |
| 9881   | 2.3c1.1 | 5.7   | 1.5   | nc     | 2/1   | 1   |
| 9882   | 2.3c1.1 | 5.7   | 1.5   | 9-5-10 | 1     | 1   |
| 9883   | 2.3c1.1 | 5.7   | 1.5   | nc     | 1     | 1   |
| 9884   | 2.3c1.1 | 5.7   | 1.5   | nc     | 2/1   | 1   |

| Strain | EMB     | VB    | MCK   | TCBS   | TSI   |     |
|--------|---------|-------|-------|--------|-------|-----|
|        | Color   | Color | Color | Color  | Color | Gas |
| 9885   | 2.3c1.1 | 5.7   | 1.5   | 9-5-10 | 1     | 1   |
| 9886   | 2.2     | 3.4   | 2.3   | nc     | 2     | 0   |
| 9887   | 1.2     | 3.6   | 2.1   | nc     | 2     | 0   |
| 9888   | 1.2     | 3.6   | 2.1   | nc     | 2     | 0   |
| 9889   | 1.2     | nc    | 2.1   | nc     | 2     | 0   |
| 9890   | 1.2     | 3.6   | 2.1   | nc     | 2     | 0   |
| 9891   | 1.2     | 3.6   | 2.1   | nc     | 2     | 0   |
| 9892   | 1.2     | 3.6   | 2.1   | nc     | 2     | 0   |
| 9893   | 1.2     | 3.6   | 2.1   | nc     | 2     | 0   |
| 9894   | 1.2     | nc    | 2.1   | nc     | 2     | 0   |
| 9895   | 1.2     | 3.6   | 2.1   | nc     | 2     | 0   |
| 9896   | 1.2     | 3.6   | 2.1   | nc     | 2     | 0   |
| 9897   | 1.2     | 3.6   | 1.1   | nc     | 2     | 0   |
| 9898   | 1.3c1.1 | 5.5   | 1.1   | nc     | nc    | nc  |
| 9899   | 1.3c1.1 | 5.5   | 1.1   | nc     | 1/2   | 0   |
| 9900   | 1.3c1.1 | 5.5   | nc    | nc     | 1/2   | 0   |
| 9901   | 1.3c1.1 | 5.5   | nc    | nc     | 1/2   | 0   |
| 9902   | 1.2     | 3.6   | 2.1   | nc     | 1     | 0   |
| 9903   | 2.4     | 3.6   | nc    | nc     | 2     | 0   |
| 9904   | nc      | nc    | 2.1   | nc     | 2     | 0   |
| 9905   | 2.4     | 3.6   | nc    | nc     | 2     | 0   |
| 9906   | 2.1     | 5.7   | 1.1   | nc     | 2     | 0   |
| 9907   | 2.1     | 5.7   | 1.1   | nc     | 1/3   | 0   |
| 9908   | 2.1     | 3.6   | 1.1   | nc     | 2/3   | 0   |
| 9909   | 2.1     | 5.7   | 1.1   | nc     | 3     | 1   |
| 9910   | 2.1     | 5.8   | 1.1   | nc     | 1/3   | 0   |
| 9911   | 2.1     | 5.8   | nc    | nc     | 1/3   | 0   |
| 9912   | 2.1     | 5.8   | 1.1   | nc     | 3     | 1   |
| 9913   | 2.1     | 5.8   | 1.1   | nc     | 3     | 0   |
| 9914   | 1.1     | 5.5   | 1.1   | nc     | 1/3   | 0   |
| 9915   | 1.1     | 5.5   | nc    | nc     | 1/3   | 0   |
| 9916   | nc      | nc    | 1.1   | nc     | 2     | 0   |
| 9917   | 1.1     | 5.5   | 1.1   | nc     | 1/3   | 0   |
| 9918   | 1.1     | 5.5   | nc    | nc     | 1/2   | 0   |

| Strain | EMB   | VB      | MCK   | TCBS  | TSI   |     |
|--------|-------|---------|-------|-------|-------|-----|
|        | Color | Color   | Color | Color | Color | Gas |
| 9919   | 1.1   | 5.8     | 1.1   | nc    | 1/3   | 1   |
| 9920   | 1.1   | 5.8     | 1.1   | nc    | 1/3   | 0   |
| 9921   | 1.1   | 5.8     | 1.1   | nc    | 1/3   | 0   |
| 9922   | 1.1   | 5.8     | 1.1   | nc    | 1/3   | 0   |
| 9923   | 1.1   | 5.8     | 1.1   | nc    | 1/3   | 0   |
| 9924   | 1.1   | 5.8     | 1.1   | nc    | 1/3   | 0   |
| 9925   | 1.1   | 5.8     | 1.1   | nc    | 1/3   | 0   |
| 9926   | 1.1   | 5.8     | 1.1   | nc    | 3     | 1   |
| 9927   | 1.1   | 5.8     | 1.1   | nc    | 3     | 1   |
| 9928   | 1.1   | 5.8     | 1.1   | nc    | 3     | 1   |
| 9929   | 1.1   | 5.8     | 1.1   | nc    | 1/3   | 0   |
| 9930   | 1.1   | 5.8     | 1.1   | nc    | 1/3   | 0   |
| 9931   | 1.1   | 5.8     | 1.1   | nc    | 1/3   | 0   |
| 9932   | 2.3   | 5.8     | 2.1   | nc    | 1/2   | 0   |
| 9933   | 2.3   | 5.8     | 2.1   | nc    | 1/2   | 0   |
| 9934   | 2.3   | 5.8     | 2.1   | nc    | 1     | 1   |
| 9935   | 2.3   | 5.5     | 1.5   | nc    | 2/1   | 0   |
| 9936   | 1.1   | 5.8     | z     | nc    | 1/3   | 0   |
| 9937   | 1.1   | 5.8     | z     | nc    | 1/2   | 0   |
| 9938   | 1.1   | 5.8     | z     | nc    | 1/3   | 0   |
| 9939   | 1.1   | 5.8     | z     | nc    | 3     | 1   |
| 9940   | 1.1   | 5.8     | z     | nc    | 1/3   | 0   |
| 9941   | 1.1   | 5.8     | z     | nc    | 1/3   | 0   |
| 9942   | 1.1   | 5.8     | z     | nc    | 1/3   | 0   |
| 9943   | 1.1   | 5.8     | z     | nc    | 1/3   | 0   |
| 9944   | 1.1   | 5.8     | z     | nc    | 1/3   | 0   |
| 9945   | 1.1   | 5.8     | z     | nc    | 1/3   | 1   |
| 9946   | 1.1   | nc      | y     | nc    | 1/2   | 0   |
| 9947   | 1.1   | 5.8     | y     | nc    | 1     | 0   |
| 9948   | 1.1   | nc      | y     | nc    | 1     | 0   |
| 9949   | 1.1   | nc      | y     | nc    | 1     | 0   |
| 9950   | 1.1   | 2.2     | y     | nc    | 1     | 0   |
| 9951   | 1.1   | 2.5c2.1 | y     | nc    | 1/2   | 0   |
| 9952   | 1.1   | 2.5c2.1 | y     | nc    | 1     | 0   |

| Strain | EMB   | VB      | MCK   | TCBS      | TSI   |     |
|--------|-------|---------|-------|-----------|-------|-----|
|        | Color | Color   | Color | Color     | Color | Gas |
| 9953   | 1.1   | 2.5c2.1 | y     | nc        | 1/2   | 0   |
| 9954   | 1.1   | 2.5c2.1 | y     | nc        | 1/2   | 0   |
| 9955   | 1.1   | 2.5c2.1 | y     | nc        | 1/2   | 0   |
| 9956   | nc    | nc      | nc    | nc        | nc    | nc  |
| 9957   | nc    | nc      | nc    | nc        | nc    | nc  |
| 9958   | nc    | nc      | nc    | nc        | nc    | nc  |
| 9959   | nc    | nc      | nc    | nc        | nc    | nc  |
| 9960   | nc    | nc      | nc    | nc        | nc    | nc  |
| 9961   | nc    | nc      | nc    | nc        | nc    | nc  |
| 9962   | nc    | nc      | nc    | nc        | nc    | nc  |
| 9963   | 1.3   | 5.7     | 1.5   | nc        | 1/2   | 0   |
| 9964   | 1.3   | 5.7     | 1.5   | 5.6 de VB | 1/2   | 0   |
| 9965   | 1.3   | 5.7     | 1.5   | 5.6 de VB | 1/2   | 0   |
| 9966   | 1.3   | 5.7     | 1.5   | 5.6 de VB | 1/2   | 0   |
| 9967   | 1.3   | 6.7     | 1.5   | nc        | 1/2   | 0   |
| 9968   | 1.3   | 6.7     | 1.5   | nc        | 1/2   | 0   |
| 9969   | 1.3   | 6.7     | 1.5   | nc        | 1/2   | 0   |
| 9970   | 1.3   | 6.7     | 1.5   | nc        | 1/2   | 0   |
| 9971   | 1.3   | 6.7     | 1.5   | nc        | 1     | 0   |
| 9972   | 1.3   | 6.7     | 1.5   | nc        | 1     | 0   |
| 9973   | 1.3   | 6.7     | 1.5   | nc        | 1/2   | 0   |
| 9974   | 1.3   | 6.7     | 1.5   | nc        | 1     | 0   |
| 9975   | 1.3   | 6.7     | 1.5   | nc        | 1     | 0   |
| 9976   | 1.1   | 6.7     | 1.1   | nc        | 1     | 0   |
| 9977   | 1.1   | 6.7     | 1.1   | nc        | 1/2   | 0   |
| 9978   | 1.1   | 6.7     | 1.1   | nc        | 1/2   | 0   |
| 9979   | 2.4   | 1.3     | 1.5   | nc        | 2     | 0   |
| 9980   | 2.4   | 1.3     | 1.5   | nc        | 2     | 0   |
| 9981   | 2.4   | 1.3     | 1.5   | nc        | 2     | 0   |
| 9982   | 2.4   | 1.3     | 1.5   | nc        | 2     | 0   |
| 9983   | 2.1   | 1.6     | 1.5   | nc        | 2     | 0   |
| 9984   | 2.1   | 1.6     | nc    | nc        | 2     | 0   |
| 9985   | 2.1   | 1.6     | 1.5   | nc        | 2     | 0   |
| 9986   | 2.1   | 1.6     | 1.5   | nc        | 2     | 0   |

| Strain | EMB     | VB    | MCK   | TCBS  | TSI   |     |
|--------|---------|-------|-------|-------|-------|-----|
|        | Color   | Color | Color | Color | Color | Gas |
| 9987   | 2.1     | 1.6   | 1.5   | nc    | 2     | 0   |
| 9988   | 2.1     | 3.6   | nc    | nc    | 2     | 0   |
| 9989   | 2.1     | 3.6   | 1.5   | nc    | 2     | 0   |
| 9990   | 2.1     | 3.6   | nc    | nc    | 2     | 0   |
| 9991   | 2.1     | 3.6   | nc    | nc    | 2     | 0   |
| 9992   | 2.1     | 3.6   | 1.5   | nc    | 2     | 0   |
| 9993   | 2.1     | 3.6   | nc    | nc    | 2     | 0   |
| 9994   | 2.1     | 3.6   | nc    | nc    | 2     | 0   |
| 9995   | 2.1     | 3.6   | nc    | nc    | 2     | 0   |
| 9996   | 2.1     | 3.6   | nc    | nc    | 2     | 0   |
| 9997   | 2.1     | 3.6   | nc    | nc    | 2     | 0   |
| 9998   | 2.1     | 1.3   | 1.5   | nc    | 2     | 0   |
| 9999   | 1.4c1.3 | 1.3   | 3.5   | nc    | 2     | 0   |
| 10000  | nc      | 1.3   | 3.5   | nc    | 2     | 0   |
| 10001  | 1.4c1.3 | 1.3   | 3.5   | nc    | 2     | 0   |
| 10002  | 1.4c1.3 | 1.3   | 3.5   | nc    | 2     | 0   |
| 10003  | 1.4c1.3 | 1.3   | 3.5   | nc    | 2     | 0   |
| 10004  | 1.4c1.3 | 1.3   | 3.5   | nc    | 2     | 0   |
| 10005  | 1.4c1.3 | 1.3   | 3.5   | nc    | 2     | 0   |
| 10006  | 1.4c1.3 | 1.3   | 1.5   | nc    | 2     | 0   |
| 10007  | 2.3     | 6.7   | 1.5   | nc    | 1     | 0   |
| 10008  | 1.3     | 6.7   | 3.5   | nc    | 1     | 0   |
| 10009  | 2.3     | 6.7   | 1.5   | nc    | 1     | 0   |
| 10010  | 2.3     | 6.7   | 1.5   | nc    | 1     | 0   |
| 10011  | 2.3     | 6.7   | 1.5   | nc    | 1     | 0   |
| 10012  | 2.3     | 6.7   | 1.5   | nc    | 1     | 0   |
| 10013  | 2.3     | 6.7   | 1.5   | nc    | 1     | 0   |
| 10014  | 2.3     | 6.7   | 1.5   | nc    | 1     | 0   |
| 10015  | 2.3     | 5.7   | 1.5   | nc    | 1     | 0   |
| 10016  | 2.3     | 5.7   | 1.5   | nc    | 1     | 0   |
| 10017  | 2.1     | 5.7   | 1.5   | nc    | 1     | 0   |
| 10018  | 2.3     | 5.7   | 1.5   | nc    | 1     | 0   |
| 10019  | 2.3     | 5.7   | 1.5   | nc    | 2/1   | 0   |
| 10020  | nc      | nc    | nc    | nc    | nc    | nc  |

| Strain | EMB     | VB    | MCK   | TCBS  | TSI   |     |
|--------|---------|-------|-------|-------|-------|-----|
|        | Color   | Color | Color | Color | Color | Gas |
| 10021  | nc      | nc    | nc    | nc    | nc    | nc  |
| 10022  | nc      | nc    | nc    | nc    | nc    | nc  |
| 10023  | 4.3c1.3 | 5.7   | nc    | nc    | 1     | 0   |
| 10024  | xc2.3   | 1.3   | nc    | nc    | 2     | 0   |
| 10025  | xc2.3   | 1.3   | 4.3   | nc    | 2     | 0   |
| 10026  | xc2.3   | 1.3   | 4.3   | nc    | 2     | 0   |
| 10027  | nc      | nc    | nc    | nc    | nc    | nc  |
| 10028  | 4.3c1.3 | 5.8   | 2.1   | nc    | 2/1   | 0   |
| 10029  | 2.1     | 5.6   | 4.3   | nc    | 2     | 0   |
| 10030  | 5.2     | 5.6   | 4.3   | nc    | 2     | 0   |
| 10031  | 5.2     | 5.6   | 4.3   | nc    | 2     | 0   |
| 10032  | 5.2     | 5.6   | 4.3   | nc    | 2     | 0   |
| 10033  | 5.2     | 5.6   | nc    | nc    | 2     | 0   |
| 10034  | nc      | 4.2   | nc    | nc    | 2     | 0   |
| 10035  | 5.2     | 4.2   | 4.3   | nc    | 2     | 0   |
| 10036  | 2.3     | 5.8   | 2.1   | nc    | 2     | 0   |
| 10037  | 2.3     | 5.8   | 2.1   | nc    | 2     | 0   |
| 10038  | 2.3     | 5.8   | 2.1   | nc    | 2     | 0   |
| 10039  | 2.3     | 5.8   | 2.1   | nc    | 2     | 0   |
| 10040  | 2.3     | 5.8   | 2.1   | nc    | 2     | 0   |
| 10041  | 2.3     | 5.8   | 2.1   | nc    | 2     | 0   |
| 10042  | 1.4c1.3 | 5.8   | 2.1   | nc    | 2     | 0   |
| 10043  | 2.3     | 5.8   | 2.1   | nc    | 2     | 0   |
| 10044  | 2.3     | 5.8   | 2.1   | nc    | 2     | 0   |
| 10045  | 2.3     | 5.8   | 2.1   | nc    | 2     | 0   |
| 10046  | 2.3     | 5.8   | 2.1   | nc    | 2     | 0   |
| 10047  | 2.3     | 5.8   | 2.1   | nc    | 2     | 0   |
| 10048  | 2.3     | 5.8   | 2.1   | nc    | 2     | 0   |
| 10049  | 2.3     | 5.8   | 2.1   | nc    | 2     | 0   |
| 10050  | 2.4     | 5.8   | 2.1   | nc    | 2     | 0   |
| 10051  | 2.4     | 5.8   | 2.1   | nc    | 2     | 0   |
| 10052  | 2.4     | nc    | 2.1   | nc    | 2     | 0   |
| 10053  | 2.4     | 5.8   | 2.1   | nc    | 2     | 0   |
| 10054  | 2.4     | nc    | 2.1   | nc    | 2     | 0   |



| Strain | EMB     | VB    | MCK   | TCBS  | TSI   |     |
|--------|---------|-------|-------|-------|-------|-----|
|        | Color   | Color | Color | Color | Color | Gas |
| 10055  | 2.4     | 5.8   | 2.1   | nc    | 2     | 0   |
| 10056  | 2.4     | 5.8   | 2.1   | nc    | 2     | 0   |
| 10057  | 2.4     | 5.8   | 2.1   | nc    | 2     | 0   |
| 10058  | 2.4     | 5.8   | 2.1   | nc    | 2     | 0   |
| 10059  | 2.4     | 5.8   | 3.1   | nc    | 2     | 0   |
| 10060  | 2.4     | 5.8   | 3.1   | nc    | 2     | 0   |
| 10061  | 2.4     | 5.8   | 3.1   | nc    | 2     | 0   |
| 10062  | 2.4     | 5.8   | 3.1   | nc    | 2     | 0   |
| 10063  | 2.4     | 5.8   | 3.1   | nc    | 2     | 0   |
| 10064  | 2.4     | 5.8   | nc    | nc    | 2     | 0   |
| 10065  | x       | nc    | nc    | nc    | 2     | 0   |
| 10066  | 1.3     | 2.2   | nc    | nc    | 2     | 0   |
| 10067  | 2.3     | 2.2   | 2.1   | nc    | 2     | 0   |
| 10068  | 2.3     | 2.2   | 2.1   | nc    | 2     | 0   |
| 10069  | 2.3     | 2.2   | 2.1   | nc    | 2     | 0   |
| 10070  | 2.3     | 6.7   | 2.5   | nc    | 2/1   | 0   |
| 10071  | 2.3     | 6.7   | 2.5   | nc    | 2/1   | 0   |
| 10072  | 2.3     | 6.7   | 2.5   | nc    | 2/1   | 0   |
| 10073  | 1.2     | 2.3   | 2.5   | nc    | 1     | 0   |
| 10074  | 1.2     | 2.3   | 2.1   | nc    | 1     | 0   |
| 10075  | 2.2     | 2.3   | 2.1   | nc    | 1     | 0   |
| 10076  | 1.4     | 1.3   | 3.5   | nc    | 1     | 0   |
| 10077  | 1.4c2.3 | 1.3   | 3.5   | nc    | 1     | 0   |
| 10078  | 1.4     | 5.7   | 3.5   | nc    | 2/1   | 0   |
| 10079  | 1.4     | 1.3   | 3.5   | nc    | 2     | 0   |
| 10080  | 1.4     | 1.3   | 3.5   | nc    | 2     | 0   |
| 10081  | 1.4     | 1.3   | 3.5   | nc    | 2     | 0   |
| 10082  | 1.4     | 1.3   | 3.5   | nc    | 2     | 0   |
| 10083  | 1.4     | 1.3   | 3.5   | nc    | 2     | 0   |
| 10084  | 1.4     | 1.3   | 3.5   | nc    | 2     | 0   |
| 10085  | 1.4     | 1.3   | 3.5   | nc    | 2     | 0   |
| 10086  | 1.4     | 1.3   | 3.5   | nc    | 2     | 0   |
| 10087  | 1.4     | 1.3   | 3.5   | nc    | 2     | 0   |
| 10088  | 1.4     | 1.3   | 3.5   | nc    | 2     | 0   |

| Strain | EMB   | VB    | MCK   | TCBS    | TSI   |     |
|--------|-------|-------|-------|---------|-------|-----|
|        | Color | Color | Color | Color   | Color | Gas |
| 10089  | 1.4   | 1.3   | 3.5   | nc      | 2     | 0   |
| 10090  | 1.4   | 1.3   | 3.5   | nc      | 2     | 0   |
| 10091  | 1.4   | 1.3   | 3.5   | nc      | 2     | 0   |
| 10092  | 2.4   | 5.8   | 2.3   | nc      | 2     | 0   |
| 10093  | 2.4   | 5.8   | 2.3   | nc      | 2     | 0   |
| 10094  | 2.4   | 5.8   | 2.3   | nc      | 2     | 0   |
| 10095  | 2.4   | 5.8   | 2.3   | nc      | 2     | 0   |
| 10096  | 2.4   | 5.8   | 2.3   | nc      | 2     | 0   |
| 10097  | 2.4   | 5.8   | 2.3   | nc      | 2     | 0   |
| 10098  | 1.3   | 3.6   | 2.3   | nc      | 2     | 0   |
| 10099  | 1.3   | 3.6   | 2.3   | nc      | 2     | 0   |
| 10100  | 1.3   | 3.6   | 2.3   | nc      | 2     | 0   |
| 10101  | 2.3   | 3.6   | 1.3   | nc      | 2     | 0   |
| 10102  | 2.3   | 5.7   | 1.3   | nc      | 1     | 0   |
| 10103  | 2.3   | 5.7   | 1.3   | 5.6deVB | 2/1   | 0   |
| 10104  | 1.1   | 5.7   | 1.3   | nc      | 1     | 0   |
| 10105  | 2.3   | 3.6   | 2.5   | nc      | 2     | 0   |
| 10106  | 2.3   | 3.6   | 2.5   | nc      | 2     | 0   |
| 10107  | 2.3   | 3.6   | 2.5   | nc      | 2     | 0   |
| 10108  | 1.2   | nc    | nc    | nc      | 2     | 0   |
| 10109  | 1.2   | nc    | nc    | nc      | 2     | 0   |
| 10110  | nc    | nc    | nc    | nc      | 2     | 0   |
| 10111  | 1.2   | nc    | 2.5   | nc      | 2     | 0   |
| 10112  | 1.2   | nc    | 2.5   | nc      | 2     | 0   |
| 10113  | nc    | nc    | nc    | nc      | 2     | 0   |
| 10114  | 1.2   | nc    | 1.5   | nc      | 2/1   | 0   |
| 10115  | 1.1   | 6.7   | 1.3   | nc      | 2/1   | 0   |
| 10116  | 1.1   | 6.7   | 1.3   | nc      | 2/1   | 0   |
| 10117  | 1.2   | 5.8   | 1.3   | nc      | 2     | 0   |
| 10118  | 1.2   | 5.8   | 1.3   | nc      | 2     | 0   |
| 10119  | 1.1   | 6.7   | 1.1   | nc      | 3     | 0   |
| 10120  | nc    | 5.7   | 1.2   | 5.6deVB | 2/1   | 0   |
| 10121  | nc    | 5.8   | nc    | xdeEMB  | 2     | 0   |
| 10122  | nc    | 5.8   | nc    | nc      | 2     | 0   |

| Strain | EMB   | VB    | MCK   | TCBS    | TSI   |     |
|--------|-------|-------|-------|---------|-------|-----|
|        | Color | Color | Color | Color   | Color | Gas |
| 10123  | nc    | 5.8   | nc    | nc      | 2     | 0   |
| 10124  | nc    | nc    | nc    | nc      | 2     | 0   |
| 10125  | nc    | 5.8   | nc    | nc      | 2/1   | 0   |
| 10126  | nc    | 5.8   | nc    | nc      | 1     | 0   |
| 10127  | nc    | 5.8   | nc    | nc      | 2/1   | 0   |
| 10128  | nc    | 5.8   | nc    | nc      | 1     | 0   |
| 10129  | 1.3   | 5.8   | 3.1   | nc      | 1     | 0   |
| 10130  | nc    | nc    | nc    | nc      | 2     | 0   |
| 10131  | nc    | nc    | nc    | nc      | 2     | 0   |
| 10132  | nc    | nc    | nc    | nc      | 2     | 0   |
| 10133  | nc    | nc    | nc    | nc      | 2     | 0   |
| 10134  | 5.8   | nc    | nc    | nc      | 2     | 0   |
| 10135  | nc    | nc    | nc    | nc      | 2     | 0   |
| 10136  | nc    | nc    | nc    | nc      | 2     | 0   |
| 10137  | nc    | nc    | nc    | nc      | 2     | 0   |
| 10138  | nc    | 5.7   | nc    | 5.6deVB | 2     | 0   |
| 10139  | nc    | 5.7   | nc    | 5.6deVB | 2/1   | 0   |
| 10140  | nc    | nc    | 2.1   | 5.6deVB | 2     | 0   |
| 10141  | nc    | 5.7   | 2.1   | nc      | 2     | 0   |
| 10142  | 1.1   | 5.7   | 2.1   | 5.6deVB | 2     | 0   |
| 10143  | 1.1   | 2.6   | 3.2   | 5.6deVB | 2     | 0   |
| 10144  | 1.1   | 2.6   | 3.2   | nc      | 2     | 0   |
| 10145  | 1.1   | 2.6   | 3.2   | nc      | 2     | 0   |
| 10146  | 2.4   | 2.5   | 1.5   | nc      | 2     | 0   |
| 10147  |       |       |       | nc      |       |     |
| 10148  | 2.4   | 2.5   | 1.5   | nc      | 2     | 0   |
| 10149  |       |       |       | nc      |       |     |
| 10150  |       |       |       | nc      |       |     |
| 10151  | 2.3   | nc    | nc    | nc      | 2     | 0   |
| 10152  | nc    | nc    | 1.5   | nc      | 2     | 0   |
| 10153  |       |       |       | nc      |       |     |
| 10154  | 1.1   | nc    | 2.3   | nc      | 2     | 0   |
| 10155  | 2.5   | nc    | 1.5   | nc      | 2/1   | 0   |
| 10156  | 2.5   | nc    | 1.5   | nc      | 1     | 0   |

| Strain | EMB     | VB    | MCK   | TCBS    | TSI   |     |
|--------|---------|-------|-------|---------|-------|-----|
|        | Color   | Color | Color | Color   | Color | Gas |
| I0157  | 2.3     | nc    | 1.5   | nc      | 2/1   | 0   |
| I0158  | 2.3     | nc    | 1.5   | nc      | 1/2   | 0   |
| I0159  | 2.3     | nc    | 1.5   | nc      | 1     | 0   |
| I0160  | 2.3     | nc    | 1.5   | nc      | 2/1   | 0   |
| I0161  | 2.2     | 6.7   | 1.5   | nc      | 1     | 0   |
| I0162  | 2.3     | nc    | 1.5   | nc      | 1/2   | 0   |
| I0163  | 2.2     | 6.7   | 1.5   | nc      | 1     | 0   |
| I0164  | 2.2     | 6.7   | nc    | nc      | 1/2   | 0   |
| I0165  | 2.3     | nc    | nc    | nc      | 2/1   | 0   |
| I0166  | 2.3     | nc    | 1.5   | nc      | 1/2   | 0   |
| I0167  | 2.3     | nc    | 1.5   | nc      | 1/2   | 0   |
| I0168  | 2.3     | nc    | 1.5   | nc      | 2/1   | 0   |
| I0169  | 2.3c1.1 | nc    | 1.5   | nc      | 1     | 0   |
| I0170  | 2.3c1.1 | nc    | nc    | nc      | 1     | 0   |
| I0171  | 2.3c1.1 | nc    | 1.3   | 5.6deVB | 2     | 0   |
| I0172  |         |       |       | nc      |       |     |
| I0173  | nc      | nc    | nc    | nc      | 2     | 0   |
| I0179  | 2.5     | 2.6   | 1.5   | nc      | 2     | 0   |
| I0180  | x       | 2.6   | 1.5   | nc      | 2     | 0   |
| I0194  | nc      | nc    | 1.5   | nc      | 2     | 0   |
| I0195  | 2.5     |       |       |         |       |     |

EMB: bacto EMB agar is recommended for gram negative bacteria and present eosin and methylene blue, making it a non selective but differential medium were the different colors allow genera identification.

VB Brilliant green is a selective medium for *Salmonella*, *Staphylococcus* and *Escherichia coli*.

MCK is a selective media for enterics and *Staphylococcus*, it differentiate lactose fermenting bacteria from non lactose.

TCBS is a selective medium for *Vibrio* and its relatives.

Color: Due to the high variability in the color shade in the mediums EMB, VB and MCK the numbers in the table are from the color code from normacolor spacial system (1990) by Mecanorma, France.

nc: no grow in that media, in such case non selective general medium as LB and Marine

poco: little

Agar were used to obtain the general strains. In those medium a great diversity of *Pseudomona* spp, Actinobacteria and *Bacillus* were obtained.

TSI is a tripe sugar iron agar is recommended for gram negative bacteria based on the fermentation of dextrose, lactose and sucrose as well as for hydrogen sulfide production. In this medium there are 2 factors that are taken into account: color and gas production (anaerobes do not produce gas, while aerobes do) the colors are 1: yellow when fermentation has taken place, the medium is acid, 2 pink when the lack fermentation turns the medium alkaline, phenol red is the indicator. When hydrogen sulfide is produced a black band appear (3) along with the yellow or pink.
